# Supplementary material for: Decline in infection-related morbidities following drug-mediated reductions in the intensity of Schistosoma infection: A systematic review and meta-analysis
Source: PubMed Central journal article supplement (PMC5333910; doi:10.1371/journal.pntd.0005372), 2017-02-17
Supplement: pntd.0005372.s003.pdf [file pntd.0005372.s003.pdf]

**S1 Table A.** Main characteristics of included studies evaluating the impact of chemotherapy on prevalence of hepatomegaly

| Publication                                                | Country   | Species* | Time follow-up (months) | Age                                | Participants (Baseline/ follow-up)                                       | Treatment**      | Method for assessing morbidity***                   | Results****                                                                                                                    |
|------------------------------------------------------------|-----------|----------|-------------------------|------------------------------------|--------------------------------------------------------------------------|------------------|-----------------------------------------------------|--------------------------------------------------------------------------------------------------------------------------------|
| Butterworth AE <i>et al.</i> 1991                          | Kenya     | S.m      | 12/24/36                | 7-15                               | OX 733/586/499/<br>431<br>PZQ<br>728/594/477/<br>499                     | OX 30<br>PZQ 40  | CE: liver surpassed the costal margin               | OX ↓ from 17,2% to 3,1%, 4% and 4,9%.<br>PZQ ↓ from 15,4% to 2,2%, 5% and 2,1%                                                 |
| DeStigter KV <i>et al.</i> 1989                            | Kenya     | S.m      | 84                      | All ages                           | 412/247                                                                  | HY 1,5           | CE: liver surpassed the costal margin               | ↓ from 18% to 6%.                                                                                                              |
| Doehring-Schwerdtfeger E <i>et al.</i> 1992                | Sudan     | S.m      | 7/23                    | School Age                         | 322/322                                                                  | PZQ 20 and 40    | US: Left lobe, height-adjusted                      | ↓ from 10.9% to 6.8% and 7.1%                                                                                                  |
| Gryseels B <i>et al.</i> 1994                              | Burundi   | S.m      | 12/24/36                | All ages (Cross-section community) | Community 1<br>706/679/649/<br>634<br>Community 2<br>732/714/665/<br>594 | PZQ 40           | CE: liver surpassed the costal margin               | Community 1<br>↑ from 27,1% to 34,2%, 37,3% and 34,2%.<br>Community 2<br>↑ from 25,3% to 30%, 33,4% and 33,5%                  |
| Homeida MA <i>et al.</i> 1991                              | Sudan     | S.m      | 36                      | Selected (Symmer's fibrosis)       | 87/68                                                                    | PZQ 40           | CE: liver surpassed the costal margin               | ↓ from 36,7% to 11,7%                                                                                                          |
| Kabateraine NB <i>et al.</i> 2007                          | Uganda    | S.m      | 12/24                   | 6-14                               | 180/180                                                                  | PZQ 40 + ALB 400 | US: PSL, height-adjusted                            | ↑ from 54,4% to 60% and ↓ to 52,8%                                                                                             |
| Ruiz-Guevara R <i>et al.</i> 2007                          | Venezuela | S.m      | 60                      | 8-54                               | 78/69                                                                    | PZQ 40           | CE: liver surpassed the costal margin               | ↓ from 55,1% to 49,3%                                                                                                          |
| Sleigh AC <i>et al.</i> 1986                               | Brazil    | S.m      | 12/24/96                | All ages (Cross-section community) | 186/145/<br>122/136                                                      | OX 20 or 15      | CE: liver surpassed the costal margin               | ↓ from 90% to 68%, 56% and 31%                                                                                                 |
| Sukwa TY <i>et al.</i> 1987<br>Sukwa TY <i>et al.</i> 1988 | Zambia    | S.m      | 1987:16<br>1988:36      | 3-60                               | 1987: 470/470<br>1988: 244/244                                           | PZQ 40           | CE: MSL and MCL (liver surpassed the costal margin) | 1987: MSL: ↓ from 77,4% to 64,8%<br>MCL: ↓ from 69,4% to 56,8%<br>1988: MSL: ↓ from 81,5% to 26,6%<br>MCL: ↓ from 68% to 27,5% |

|                                                      |           |         |                    |                                       |                                                                          |                         |                                                     |                                                                                                                    |
|------------------------------------------------------|-----------|---------|--------------------|---------------------------------------|--------------------------------------------------------------------------|-------------------------|-----------------------------------------------------|--------------------------------------------------------------------------------------------------------------------|
| Sukwa TY 1993                                        | Zambia    | S.m     | 12                 | 7-19                                  | Group A (2x treatment):<br>176/176<br>Group B (1x treatment):<br>167/167 | PZQ 40                  | CE: MSL and MCL (liver surpassed the costal margin) | A: MSL: ↓ from 34,7% to 9%<br>MCL: ↓ from 9,7% to 1,1%<br>B: MSL ↓ from 37,7% to 10,8%<br>MCL: ↓ from 4,8% to 0,6% |
| Carlton EJ <i>et al.</i> 2010                        | China     | S.j     | 24/60              | 4-60                                  | 462/440/317                                                              | PZQ                     | US: left and right hepatic lobe, height-adjusted    | Left lobe: = from 16% to 15% and ↑ to 21%<br>Right lobe: ↓ from 24% to 9% and 13%.                                 |
| Hadidjaja P <i>et al.</i> 1985                       | Indonesia | S.j     | 8                  | All ages                              | 159/159                                                                  | PZQ 30                  | CE: liver surpassed the costal margin               | ↓ from 67,9% to 50,9%                                                                                              |
| Li YS <i>et al.</i> 2000<br>Li YS <i>et al.</i> 2002 | China     | S.j     | 2000:24<br>2002:60 | 9-65                                  | 2000: 193/193<br>2002: 120/120                                           | PZQ 40                  | US: left hepatic lobe<br>(Cairo protocol)           | 2000: ↓ from 26,4% to 19,2%<br>2002: ↓ from 24,2% to 11,7%                                                         |
| Wiest PM <i>et al.</i> 1994                          | China     | S.j     | 12/24              | All ages<br>(Cross-section community) | 825/592/592                                                              | PZQ 50                  | US: MCL ≥ 2cm<br>MSL ≥ 3cm                          | MCL: ↓ from 34% to 25% and 18%.<br>MSL: ↓ from 89%, to 70% and 66%                                                 |
| Zhao G <i>et al.</i> 1995                            | China     | S.j     | 12                 | 3-60                                  | 592/592                                                                  | PZQ 60                  | CE: MSL and MCL (liver surpassed the costal margin) | MSL: ↓ from 62,8% to 44,6%<br>MCL: ↑ from 15% to 22,8%                                                             |
| Stephenson LS <i>et al.</i> 1989                     | Kenya     | S.h     | 8                  | 6-17                                  | PZQ:105/105<br>MET:103/103<br>PLB:104/104                                | PZQ 40<br>MET 10<br>PLB | CE: ≥ 1cm below right costal margin                 | PZQ: ↓ from 11,4% to 10,5%<br>MET: ↑ from 8,7% to 12,6%<br>PLB: ↑ from 7,7% to 15,4%                               |
| Stephenson LS <i>et al.</i> 1985                     | Kenya     | S.h     | 6                  | 6-15                                  | MET:202/202<br>PLB:198/198                                               | MET 20<br>PLB           | CE: ≥ 1cm below right costal margin                 | MET- ↓ from 14% to 8%,<br>PLB- ↑ from 19% to 28%.                                                                  |
| Koukounari A <i>et al.</i> 2010                      | Mali      | S.m/S.h | 12                 | 7-14                                  | 853/853                                                                  | PZQ                     | US: left hepatic lobe<br>CE: MCL > 2cm              | ↓ from 1,4% to 0,2%<br>MCL: ↓ from 4,45% to 0,7%                                                                   |

\* Sm: *Schistosoma mansoni*, Sj: *Schistosoma japonicum*, Sh: *Schistosoma haematobium*

\*\* PZQ: Praziquantel, OX: Oxaminiquine, MET: Metrifonate, HY: Hycanthon, PLB: Placebo, ALB: Albendazole. Following number indicates dosage/kg of one therapy course.

\*\*\*CE: Clinical examination; US: ultrasonography; MCL: midclavicular line; MSL: midsternal line; PSL: parasternal line

\*\*\*\*Decreased: ↓, Increased: ↑, Unchanged: =

**S1 Table B.** Main characteristics of included studies evaluating the impact of chemotherapy on prevalence of splenomegaly

| Publication                                                | Country   | Species* | Time follow-up (months) | Age                                        | Participants (Baseline/ follow-up)                                       | Treatment **  | Method for assessing morbidity***            | Results****                                                                                                            |
|------------------------------------------------------------|-----------|----------|-------------------------|--------------------------------------------|--------------------------------------------------------------------------|---------------|----------------------------------------------|------------------------------------------------------------------------------------------------------------------------|
| Cook JA <i>et al.</i> 1977                                 | St. Lucia | S.m      | 6                       | School age                                 | HY: 16<br>PLB: 16                                                        | HY 2,5        | CE: HG > 0                                   | HY: = from 12,5% to 12,5%<br>PLB: = from 31,25% to 31,25%                                                              |
| Cota GF <i>et al.</i> 2006                                 | Brazil    | S.m      | 48                      | 15-43<br>Selected (all hepatosplenomegaly) | 42/42                                                                    | OX 15 or 20   | US: cranio-caudal extension, height adjusted | ↓ from 40% to 21,4%                                                                                                    |
| DeStigter KV <i>et al.</i> 1989                            | Kenya     | S.m      | 84                      | All ages                                   | 412/247                                                                  | HY 1,5        | CE: HG > 1                                   | ↓ from 3% to 0,8%.                                                                                                     |
| Doehring-Schwerdtfeger E <i>et al.</i> 1992                | Sudan     | S.m      | 7/23                    | School Age                                 | 322/322                                                                  | PZQ 20 and 40 | US: cranio-caudal extension, height adjusted | ↑ from 36,1% to 39,8% and 40,1%                                                                                        |
| Gryseels B <i>et al.</i> 1994                              | Burundi   | S.m      | 12/24/36                | All ages (Cross-section community)         | Community 1<br>706/679/649/<br>634<br>Community 2<br>732/714/665/<br>594 | PZQ 40        | CE: HG > 1                                   | Community 1<br>↑ from 20,8% to 22,1% and to ↓17,6% and 13,6%.<br>Community 2<br>↑ from 33,7% to 36,7%, 37,3% and 38,9% |
| Homeida MA <i>et al.</i> 1991                              | Sudan     | S.m      | 36                      | Selected (all with Symmer's fibrosis)      | 87/68                                                                    | PZQ 40        | CE                                           | ↓ from 47,1% to 30,9%                                                                                                  |
| Ruiz-Guevara R <i>et al.</i> 2007                          | Venezuela | S.m      | 60                      | 8-54                                       | 78/70                                                                    | PZQ 40        | CE: spleen surpassed the costal margin       | ↓ From 3,8% to 0%                                                                                                      |
| Sleigh AC <i>et al.</i> 1986                               | Brazil    | S.m      | 12/24/96                | All ages (Cross-section community)         | 186/145/<br>122/136                                                      | OX 20 or 15   | CE: spleen surpassed the costal margin       | ↓ from 18% to 12%, 7% and 3%                                                                                           |
| Sukwa TY <i>et al.</i> 1987<br>Sukwa TY <i>et al.</i> 1988 | Zambia    | S.m      | 16<br>36                | 3-60                                       | 1987: 470/470<br>1988: 244/244                                           | PZQ 40        | CE: HG > 0                                   | 1987: ↓ from 80,2% to 69,8%<br>1988: ↓ from 77,9% to 51,2%                                                             |
| Sukwa TY 1993                                              | Zambia    | S.m      | 12                      | 7-19                                       | Group A (2x treatment):<br>176/176<br>Group B (1x treatment):<br>167/167 | PZQ 40        | CE: HG > 0                                   | A: ↓ from 16,5% to 5,1%<br>B: ↓ from 15,6% to 6%                                                                       |

|                                                      |           |         |                      |                                          |                                           |                         |                                                                      |                                                                              |
|------------------------------------------------------|-----------|---------|----------------------|------------------------------------------|-------------------------------------------|-------------------------|----------------------------------------------------------------------|------------------------------------------------------------------------------|
| Stephenson<br>LS <i>et al.</i> 1989                  | Kenya     | S.h     | 8                    | 6-17                                     | PZQ:105/105<br>MET:103/103<br>PLB:104/104 | PZQ 40<br>MET 10<br>PLB | CE: below costal<br>margin<br>Hackett grade > 0                      | PZQ:↑from 46,6% to 63,8%<br>MET:↑from 54,4% to 61,2%<br>PLB:↑from 52% to 88% |
| Stephenson<br>LS <i>et al.</i> 1985                  | Kenya     | S.h     | 6                    | 6-15                                     | MET:202/202<br>PLB:198/198                | MET 20<br>PLB           | CE: below costal<br>margin<br>HG > 0                                 | MET:↓from 62% to 47%,<br>PLB:↑from 58% to 72%.                               |
| Carlton EJ <i>et al.</i> 2010                        | China     | S.j     | 24/60                | 4-60                                     | 460/439/316                               | PZQ                     | US: from the hilum<br>to the opposite<br>section, height<br>adjusted | ↓ from 4% 3% and 2%.                                                         |
| Hadidjaja P <i>et al.</i> 1985                       | Indonesia | S.j     | 8                    | All ages                                 | 159/159                                   | PZQ 30                  | CE: HG > 1                                                           | ↑ from 45,9% to 47,2%                                                        |
| Li YS <i>et al.</i> 2000<br>Li YS <i>et al.</i> 2002 | China     | S.j     | 2000: 24<br>2002: 60 | 9-65                                     | 2000: 193/193<br>2002: 120/120            | PZQ 40                  | US: Cairo protocol.                                                  | 2000:↓ from 4,1% to 1,6%<br>2002:↓ from 5,8% to 4,2%                         |
| Wiest PM <i>et al.</i> 1994                          | China     | S.j     | 12/24                | All ages<br>(Cross-section<br>community) | 825/592/592                               | PZQ 50                  | US: HG > 1                                                           | ↓ from 22% to 5% and 2%.                                                     |
| Zhao G <i>et al.</i> 1995                            | China     | S.j     | 12                   | 3-60                                     | 592/592                                   | PZQ 60                  | CE: HG > 0                                                           | ↓ from 22,12% to 20,1%                                                       |
| Koukounari A <i>et al.</i> 2010                      | Mali      | S.m/S.h | 12                   | 7-14                                     | 853/853                                   | PZQ                     | CE: MCL > 2cm                                                        | ↓ from 16,1% to 4,8%                                                         |

\* Sm: *Schistosoma mansoni*, Sj: *Schistosoma japonicum*, Sh: *Schistosoma haematobium*

\*\* PZQ: Praziquantel, OX: Oxaminiquine, MET: Metrifonate, HY: Hycanthon; PLB: Placebo, ALB: Albendazole. Following number indicates dosage/kg of one therapy course.

\*\*\*CE: Clinical examination; US: ultrasonography; HG: Hackett grade

\*\*\*\*Decreased:↓, Increased:↑, Unchanged: =

**S1 Table C.** Main characteristics of included studies evaluating the impact of chemotherapy on prevalence of periportal fibrosis

| Publication                                          | Country   | Species* | Time follow-up (months)       | Age                                               | Participants (Baseline/follow-up)    | Treatment**   | Method for assessing morbidity***                          | Results****                                                |
|------------------------------------------------------|-----------|----------|-------------------------------|---------------------------------------------------|--------------------------------------|---------------|------------------------------------------------------------|------------------------------------------------------------|
| Berhe N <i>et al.</i> 2008                           | Ethiopia  | S.m      | 26                            | 22-26<br>(Selected; all with Periportal fibrosis) | 199/199                              | PZQ 40        | WHO-Niamey classification                                  | ↓ from 100% to 65,3%                                       |
| Cota GF <i>et al.</i> 2006                           | Brazil    | S.m      | 48                            | 15-43<br>(all hepatosplenic)                      | 42/42                                | OX 15 or 20   | Two degrees of severity                                    | ↓ from 45,2% to 30,9%                                      |
| Doehring-Schwerdtfeger E <i>et al.</i> 1992          | Sudan     | S.m      | 7/23                          | School Age                                        | 322/322                              | PZQ 20 and 40 | Three degrees of severity                                  | ↓ from 36,6% to 34,8% and 21,7%                            |
| Frenzel K <i>et al.</i> 1999                         | Uganda    | S.m      | Group A: 12/31<br>Group B: 31 | All ages                                          | A: 460/460<br>B: 192/192             | PZQ 40        | Three degrees of severity. Managil classification.         | A: ↓ from 46% to 32% and 35%<br>B: ↓ from 51% to 28%       |
| Homeida MA <i>et al.</i> 1991                        | Sudan     | S.m      | 12/24/36                      | Selected (all with Symmer's fibrosis)             | 48/48/48                             | PZQ 40        | Three degrees of severity                                  | ↓ from 100% to 97%, 91% and 88%                            |
| Martins-Leite P <i>et al.</i> 2008                   | Brazil    | S.m      | 12                            | 14-85                                             | 91/91                                | PZQ 50        | Three degrees of severity.                                 | ↓ from 49,4% to 36,3%                                      |
| Rahound S <i>et al.</i> 2010                         | Sudan     | S.m      | 39                            | All ages<br>(all with Periportal fibrosis)        | 177/177                              | PZQ 40        | Three degrees of severity. Cairo Work group classification | ↓ from 100% to 72,3%                                       |
| Ruiz-Guevara R <i>et al.</i> 2007                    | Venezuela | S.m      | 60                            | 8-54                                              | 78/78                                | PZQ 40        | N-BH classification (degrees of fibrosis)                  | ↓ From 29,5% to 5,1%                                       |
| Carlton EJ <i>et al.</i> 2010                        | China     | S.j      | 24/60                         | 4-60                                              | 578/444/321                          | PZQ           | Three degrees of severity. Cairo Work group classification | ↑ from 3,63% to 4,3% and ↓ to 0,93%.                       |
| Li YS <i>et al.</i> 2000<br>Li YS <i>et al.</i> 2002 | China     | S.j      | 24<br>60                      | 9-65                                              | 2000:<br>193/193<br>2002:<br>120/120 | PZQ 40        | Three degrees of severity. Cairo Work group classification | 2000: ↓ from 48,7% to 39,4%<br>2002: ↑ from 20,8% to 25,8% |
| Wiest PM <i>et al.</i> 1994                          | China     | S.j      | 12/24                         | All ages<br>(Community base)                      | 631/542/507                          | PZQ 50        | Three degrees of severity                                  | ↓ from 46% to 28% and 38%.                                 |

\* *Schistosoma mansoni*, S.j: *Schistosoma japonicum*

\*\* PZQ: Praziquantel, OX: Oxaminiquine. Following number indicates dosage/kg of one therapy course.

\*\*\*N-BH: Niamey-Belo Horizonte

\*\*\*\*Decreased: ↓, Increased: ↑

**S1 Table D.** Main characteristics of included studies evaluating the impact of chemotherapy on prevalence of dilated portal vein

| Publication                                          | Country | Species* | Time follow-up (months) | Age                                              | Participants (Baseline/ follow-up) | Treatment**      | Method for assessing morbidity***                                          | Results****                                                 |
|------------------------------------------------------|---------|----------|-------------------------|--------------------------------------------------|------------------------------------|------------------|----------------------------------------------------------------------------|-------------------------------------------------------------|
| Carlton EJ <i>et al.</i> 2010                        | China   | S.j      | 24                      | 4-60                                             | 462/440                            | PZQ              | Measurements and classifications were according to WHO Guidelines.         | ↑ from 10% to 13%                                           |
| Li YS <i>et al.</i> 2000<br>Li YS <i>et al.</i> 2002 | China   | S.j      | 2000: 24<br>2002: 60    | 9-65                                             | 2000:193/193<br>2002:120/120       | PZQ 40           | Measurements and classifications were according to the CAIRO protocol.     | 2000: ↓ from 16,06% to 11,4%<br>2002: ↓ from 19,1% to 10,8% |
| Vennervald BJ <i>et al.</i> 2005                     | Kenya   | S.m      | 12/24/36                | 7-18<br>all with the left lobe liver enlargement | 67/67/67/67                        | PZQ 40           | Measurements and classifications were according to WHO Guidelines.         | ↓ from 16,4% to 13,4%, 11,9% and 2,3%                       |
| Kabatereine NB <i>et al.</i> 2007                    | Uganda  | S.m      | 12/24                   | 6-14                                             | 180/180/180                        | PZQ 40 + ALB 400 | Measurements and classifications were according to the WHO protocol (N-BH) | ↓ from 17,7% to 2,2% and 3,3%                               |

\* Sm: *Schistosoma mansoni*, S.j: *Schistosoma japonicum*

\*\* PZQ: Praziquantel, ALB: Albendazole. Following number indicates dosage/kg of one therapy course.

\*\*\*\* WHO Guidelines: Richter J, Hatz C, Campagne G, Bergquist NR, Jenkins JM (2000). Ultrasound in Schistosomiasis: A practical guide to the standard use of ultrasonography for the assessment of schistosomiasis-related morbidity. Geneva: WHO; N-BH: Niamey-Belo Horizonte.

\*\*\*Decreased: ↓, Increased: ↑

**S1 Table E.** Main characteristics of included studies evaluating the impact of chemotherapy on prevalence of diarrhea

| Publication                   | Country   | Species* | Time follow-up (months) | Age                                     | Participants (Baseline/follow-up)                | Treatment**  | Method for assessing morbidity  | Results***                                                                                  |
|-------------------------------|-----------|----------|-------------------------|-----------------------------------------|--------------------------------------------------|--------------|---------------------------------|---------------------------------------------------------------------------------------------|
| Betson M <i>et al.</i> 2012   | Uganda    | S.m      | 6/12                    | 1-5                                     | 377/372/369                                      | PZQ 40 + ALB | Questionnaire                   | ↓ from 36,6% to 28,2% and ↑ to 52,6%                                                        |
| Cook JA <i>et al.</i> 1977    | St. Lucia | S.m      | 6                       | School Age                              | HY: 16/16<br>PLB: 16/16                          | HY 2,5       | Questionnaire-previous 6 months | HY: ↓ from 56,2% to 12,5<br>PLB: ↓ from 25% to 12,5%                                        |
| Gryseels B <i>et al.</i> 1994 | Burundi   | S.m      | 6/24/36                 | All ages<br>(2 Cross-section community) | A: 706/693/<br>649/634<br>B: 732/751/<br>665/594 | PZQ 40       | Questionnaire-previous 3 months | A: ↓ from 26,2% to 21,1%, 13,6% and 10,2%<br>B: ↓ from 19,1% to 13,4%, ↑ 15% and ↓ to 10,1% |
| Kongs A <i>et al.</i> 1996    | Senegal   | S.m      | 12                      | All ages                                | 279/279                                          | PZQ 30       | Questionnaire-previous 15 days  | ↓ from 54,8% to 29,03%                                                                      |
| Peixinho E <i>et al.</i> 1986 | Brazil    | S.m      | 2                       | 9-18                                    | 51/51                                            | OX + MEB     | Questionnaire                   | ↓ from 74,5% to 13,72%                                                                      |
| Sukwa TY <i>et al.</i> 1987   | Zambia    | S.m      | 16                      | All ages                                | 523/523                                          | PZQ 40       | Questionnaire-previous 15 days  | ↓ from 31,35% to 14,53%                                                                     |
| Zhao G <i>et al.</i> 1995     | China     | S.j      | 12                      | All ages                                | 592/592                                          | PZQ 60       | Questionnaire-previous 15 days  | ↓ from 15% to 25%                                                                           |

\* Sm: *Schistosoma mansoni*, Sj: *Schistosoma japonicum*

\*\* PZQ: Praziquantel, MEB: Mebendazole, OX: Oxaminiquine, HY: Hycanthone, PLB: Placebo. Following number indicates dosage/kg of one therapy course.

\*\*\*Decreased: ↓ Increased: ↑

**S1 Table F** Main characteristics of included studies evaluating the impact of chemotherapy on prevalence of blood in stool

| Publication                   | Country    | Species* | Time follow-up (months) | Age      | Participants (Baseline/follow-up) | Treatment**  | Method for assessing morbidity | Results***                                            |
|-------------------------------|------------|----------|-------------------------|----------|-----------------------------------|--------------|--------------------------------|-------------------------------------------------------|
| Betson M <i>et al.</i> 2012   | Uganda     | S.m      | 6/12                    | 1-5      | 377/372/369                       | PZQ 40 + ALB | Questionnaire                  | ↓ from 11,9% to 6,2% and ↑ to 11,1%                   |
| Boisier P <i>et al.</i> 1998  | Madagascar | S.m      | 24/36                   | All ages | 289/289/289                       | PZQ 40       | Questionnaire                  | ↓ from 24,9% to 4,6% and 8,4%                         |
| Kongs A <i>et al.</i> 1996    | Senegal    | S.m      | 12                      | All ages | 279/279                           | PZQ 30       | Questionnaire-previous 15 days | ↓ from 44,1% to 11,1%                                 |
| Peixinho E <i>et al.</i> 1986 | Brazil     | S.m      | 2                       | 9-18     | 51/51                             | OX + MEB     | Questionnaire                  | ↓ from 74,5% to 13,72%                                |
| Sukwa TY <i>et al.</i> 1987   | Zambia     | S.m      | 16                      | All ages | 523/523                           | PZQ 40       | Questionnaire-previous 15 days | ↓ from 12,42% to 1,91%                                |
| Sukwa TY <i>et al.</i> 1993   | Zambia     | S.m      | 6                       | 7-19     | A: 190/185<br>B: 187/180          | PZQ 40       | Questionnaire-previous 15 days | A: ↓ from 52,6% to 23,24%<br>B: ↓ from 47,5% to 24,4% |
| Zhao G <i>et al.</i> 1995     | China      | S.j      | 12                      | All ages | 592/592                           | PZQ 60       | Questionnaire-previous 15 days | ↓ from 26,68% to 19,93%                               |

\* Sm: *Schistosoma mansoni*, Sj: *Schistosoma japonicum*

\*\* PZQ: Praziquantel, MEB: Mebendazole, OX: Oxaminiquine, ALB: Albendazole. Following number indicates dosage/kg of one therapy course.

\*\*\*Decreased: ↓, Increased: ↑



**S1 Table G.** Main characteristics of included studies evaluating the impact of chemotherapy on prevalence of blood in urine

| Publication                        | Country      | Species* | Time follow-up (months) | Age                                       | Participants (Baseline/ follow-up) | Treatment**           | Method for assessing morbidity*** | Results****                                           |
|------------------------------------|--------------|----------|-------------------------|-------------------------------------------|------------------------------------|-----------------------|-----------------------------------|-------------------------------------------------------|
| Campagne G <i>et al.</i> 2001      | Niger        | S.h      | 5/34                    | 7-15                                      | 114/105/87                         | PZQ 40 + ALB          | Nephur-7-test                     | ↓ from 87,7% to 24,7% and 25,2%                       |
| Delegue P <i>et al.</i> 1998       | Senegal      | S.h      | 4                       | All ages                                  | 203/182                            | PZQ 40                | Hemastix Bayer                    | ↓ from 34,9% to 9,8%                                  |
| Kahama AI <i>et al.</i> 1999       | Kenya        | S.h      | 6/18                    | 6-15                                      | 117/117/117                        | PZQ 40                | Hemastix Bayer                    | ↓ from 92,3% to 24,7% and ↑ to 63,8%                  |
| Kiliku FM <i>et al.</i> 1991       | Kenya        | S.h      | 3                       | All ages                                  | 426/426                            | PZQ 40                | Uro-Labstix III                   | ↓ from 40,6% to 15,2%                                 |
| King C <i>et al.</i> 1990          | Kenya        | S.h      | 12                      | 4-21                                      | MET: 896/705<br>PZQ: 877/695       | MET 10 (3x)<br>PZQ 40 | Fisher Scientific                 | MET: ↓ from 74% to 17%<br>PZQ: ↓ from 76% to 17%      |
| Kitange HM <i>et al.</i> 1993      | Tanzania     | S.h      | 12                      | 7-19                                      | 253/253                            | PZQ 40 + ALB          | BM TEST 5L                        | ↓ from 38,3% to 27,6%                                 |
| Koukounari A <i>et al.</i> 2007    | Burkina Faso | S.h      | 12                      | 6-14                                      | 1.124/1.124                        | PZQ 40 + ALB          | Hemastix Bayer                    | ↓ from 49,4% to 10,5%                                 |
| Mekonnen A <i>et al.</i> 2013      | Ethiopia     | S.h      | 2                       | All ages<br>Selected (all with hematuria) | 152/152                            | PZQ 40                | URS-11                            | ↓ from 100% to 40,7%                                  |
| Mott KE <i>et al.</i> 1985         | Ghana        | S.h      | 6                       | All ages                                  | 230/230                            | PZQ 40                | Neostix-3                         | ↓ from 76,5% to 26,9%                                 |
| Rasendramino MH <i>et al.</i> 1998 | Madagascar   | S.h      | 12                      | All ages                                  | 435/435                            | PZQ 40                | Néphur 7 test                     | ↓ from 72,4% to 31,4%                                 |
| Sarda RK <i>et al.</i> 1987        | Tanzania     | S.h      | 6                       | School Age                                | PZQ: 67/67<br>PLB: 30/30           | PZQ 40 + ALB          | Combur Test                       | PZQ: ↓ from 85% to 2,9%<br>PLB: ↑ from 86,6% to 96,6% |
| Sissoko MS <i>et al.</i> 2009      | Mali         | S.h      | 1                       | 6-15                                      | 387/397                            | PZQ 40 + ALB<br>400   | Hemastix Bayer                    | ↓ from 87,5% to 49,8%                                 |
| Stephenson LS <i>et al.</i> 1984   | Kenya        | S.h      | 6                       | 6-16                                      | MET:244/244<br>PLB:202/202         | MET 7,5 (3x)          | Ames N-Multistix                  | MET: ↓ from 91,8% to 29%<br>PLB: = 90%                |

|                                   |                  |     |      |            |               |              |                |                                         |
|-----------------------------------|------------------|-----|------|------------|---------------|--------------|----------------|-----------------------------------------|
| Stete K <i>et al.</i><br>2012     | Côte<br>d'Ivoire | S.h | 2    | School Age | 90/90         | PZQ 40       | Combur-7-TestR | ↓ from 87,7% to 16,6%                   |
| Tohon ZB <i>et al.</i><br>2008    | Niger            | S.h | 12   | 7-11       | 1.412/1.412   | PZQ 40 + ALB | Hemastix Bayer | ↓ from 53,4% to 6%                      |
| Wagatsuma Y<br><i>et al.</i> 1999 | Ghana            | S.h | 6/18 | All ages   | 1.202/660/595 | PZQ 40 + ALB | -              | ↓ from 77,5% to 14,4%<br>and ↑ to 29,9% |

\* Sh: *Schistosoma haematobium*

\*\* PZQ: Praziquantel, MET: Metrifonate, ALB: Albendazole, PLB: Placebo. Following number indicates dosage/kg of one therapy course.

\*\*\* All: semi-quantitatively using reagent strips.

\*\*\*\* Decreased: ↓, Increased: ↑, Unchanged: =

**S1 Table H.** Main characteristics of included studies evaluating the impact of chemotherapy on prevalence of protein in urine

| Publication                        | Country       | Species* | Time follow-up (months) | Age                                        | Participants (Baseline/ follow-up) | Treatment**           | Method for assessing morbidity*** | Results****                                         |
|------------------------------------|---------------|----------|-------------------------|--------------------------------------------|------------------------------------|-----------------------|-----------------------------------|-----------------------------------------------------|
| Kiliku FM <i>et al.</i> 1991       | Kenya         | S.h      | 3                       | All ages                                   | 426/426                            | PZQ 40                | Uro-Labstix III                   | ↓ from 62% to 48,3%                                 |
| King C <i>et al.</i> 1990          | Kenya         | S.h      | 12                      | 4-21                                       | MET: 896/705<br>PZQ: 877/695       | MET 10 (3x)<br>PZQ 40 | Fisher Scientific                 | MET: ↓ from 72% to 29%<br>PZQ: ↓ from 75% to 27%    |
| Kitange HM <i>et al.</i> 1993      | Tanzania      | S.h      | 12                      | 7-19                                       | 253/253                            | PZQ 40 + ALB          | BM TEST 5L                        | ↑ from 12,2% to 15,8%                               |
| Koukounari A <i>et al.</i> 2007    | Burkina Faso  | S.h      | 12                      | 6-14                                       | 1.124/1.124                        | PZQ 40 + ALB          | Hemastix Bayer                    | ↓ from 49,4% to 10,5%                               |
| Mekonnen A <i>et al.</i> 2013      | Ethiopia      | S.h      | 2                       | All ages,<br>Selected (all with hematuria) | 152/152                            | PZQ 40                | URS-11                            | ↓ from 94,07% to 48,7%                              |
| Mott KE <i>et al.</i> 1985         | Ghana         | S.h      | 6                       | All ages                                   | 230/230                            | PZQ 40                | Neostix-3                         | ↓ from 90,8% to 42,6%                               |
| Rasendramino MH <i>et al.</i> 1998 | Madagascar    | S.h      | 12                      | All ages                                   | 435/435                            | PZQ 40                | Néphur 7 test                     | ↓ from 62,3% to 20,2%                               |
| Sarda RK <i>et al.</i> 1987        | Tanzania      | S.h      | 6                       | School Age                                 | PZQ: 67/67<br>PLB: 30/30           | PZQ 40 + ALB          | Combur Test                       | PZQ: ↓ from 79,1% to 5,8%<br>PLB: ↑ from 70% to 90% |
| Stephenson LS <i>et al.</i> 1984   | Kenya         | S.h      | 6                       | 6-16                                       | MET:244/244<br>PLB:202/202         | MET 7,5 (3x)          | Ames N-Multistix                  | MET: ↓ from 76% to 14%<br>PLB: ↓ from 63% to 54%    |
| Stete K <i>et al.</i> 2012         | Côte d'Ivoire | S.h      | 2                       | School Age                                 | 90/90                              | PZQ 40                | Combur-7-TestR                    | ↓ from 70% to 11,6%                                 |
| Wagatsuma Y <i>et al.</i> 1999     | Ghana         | S.h      | 6/18                    | All ages                                   | 1.202/660/595                      | PZQ 40 + ALB          | -                                 | ↓ from 74,5% to 1,3% and ↑ to 8,6%                  |

\* Sh: *Schistosoma haematobium*

\*\* PZQ: Praziquantel, MET: Metrifonate, ALB: Albendazole, PLB: Placebo. Following number indicates dosage/kg of one therapy course.

\*\*\* All: semi-quantitatively using reagent strips.

\*\*\*\*Decreased:↓, Increased:↑

**S1 Table I.** Main characteristics of included studies evaluating the impact of chemotherapy on prevalence of ultrasound abnormalities in the urinary bladder

| Publication                        | Country    | Species* | Time follow-up (months) | Age                                                                             | Participants (Baseline/follow-up) | Treatment**            | Method for assessing morbidity***                            | Results****                                        |
|------------------------------------|------------|----------|-------------------------|---------------------------------------------------------------------------------|-----------------------------------|------------------------|--------------------------------------------------------------|----------------------------------------------------|
| Campagne G <i>et al.</i> 2001      | Niger      | Sh       | 2/34                    | 7-15                                                                            | 114/112/87                        | PZQ 40                 | BL: Shape and/or TW and/or BW Irreg. and/or Mass and/or PP   | ↓ from 89,5% to 48,2% and 72,4%                    |
| Delegue P <i>et al.</i> 1998       | Senegal    | Sh       | 4                       | All ages                                                                        | 203/182                           | PZQ 40                 | BL: TW                                                       | ↓ from 22,6% to 8,8%                               |
| Devidas A <i>et al.</i> 1989       | Niger      | Sh       | 10                      | All ages                                                                        | 149/149                           | PZQ 40                 | BL: TW and/or BW Irreg. and/or Hypertrophy.                  | ↓ from 79,8 to 32,2%                               |
| Doehring E <i>et al.</i> 1986      | Congo      | Sh       | 12                      | All ages Selected-Pathological ultrasonographical findings of the urinary tract | 103/103                           | PZQ 40                 | BL: TW and/or PP and/or Calcification                        | ↓ from 100% to 7,8%                                |
| Kahama AI <i>et al.</i> 1999       | Kenya      | Sh       | 4/12/18                 | 6-15                                                                            | 117/117/117                       | PZQ 40                 | BL: TW and/or Mass and/or PP and/or Dilatation of the Ureter | ↓ from 58,12% to 17,9% and ↑ to 51,2%              |
| King CH <i>et al.</i> 1988         | Kenya      | Sh       | 12                      | 4-21                                                                            | 363/363                           | PZQ 40 or MET 30       | BL: TW                                                       | ↓ from 19% to 6,8%                                 |
| King CH <i>et al.</i> 2002         | Kenya      | Sh       | 9                       | 4-23                                                                            | 1: 99/99<br>2: 101/101            | 1: PZQ 20<br>2: PZQ 40 | BL: TW and/or BW Irreg.                                      | 1: ↓ from 21,2% to 6,1%<br>2: ↓ from 18,8% to 3,9% |
| Ramarakoto CE <i>et al.</i> 2008   | Madagascar | Sh       | 6                       | Selected (no children) 17-48                                                    | 130/130                           | PZQ 40                 | BL: Shape and/or TW and/or BW Irreg. and/or mass and/or PP   | ↓ from 68,5% to 21,5%                              |
| Rasendramino MH <i>et al.</i> 1998 | Madagascar | Sh       | 12                      | All ages                                                                        | 472/472                           | PZQ 40                 | BL: Shape and/or TW and/or BW                                | ↓ from 50% to 16,1%                                |

|                               |          |    |         |                                                                                              |                      |                        |                                                |                                                    |
|-------------------------------|----------|----|---------|----------------------------------------------------------------------------------------------|----------------------|------------------------|------------------------------------------------|----------------------------------------------------|
|                               |          |    |         |                                                                                              |                      |                        | Irreg. and/or Mass                             |                                                    |
| Reimert CM <i>et al.</i> 2000 | Tanzania | Sh | 4/12/18 | 7-17                                                                                         | 514/384/423/422      | PZQ 40                 | BL: TW and/or BW Irreg. and/or Mass and/or PP  | ↓ from 62,2% to 15,6% and ↑ to 19,6% and 31,7%     |
| Tohon ZB <i>et al.</i> 2008   | Niger    | Sh | 12      | 7-11                                                                                         | 1.409/1.409          | PZQ 40 + ALB 400       | BL: Niamey protocol                            | ↓ from 41,6% to 14,7%                              |
| Traore M <i>et al.</i> 1998   | Mali     | Sh | 12      | All ages                                                                                     | 648/648              | PZQ 40                 | BL: BW Irreg.                                  | ↓ from 25,5% to 14,9%                              |
| Hatz C <i>et al.</i> 1990     | Tanzania | Sh | 6       | 7-20,<br>Selected-<br>Pathological<br>ultrasonographical<br>findings of the<br>urinary tract | 1: 72/72<br>2: 52/52 | 1: PZQ 40<br>2: PZQ 20 | BL: TW and/or BW Irreg. and/or Mass and/or PP. | 1: ↓ from 86,1% to 5,5%<br>2: ↓ from 80,7% to 1,9% |

\* Sh: *Schistosoma haematobium*

\*\* PZQ: Praziquantel, MET: Metrifonate, ALB: Albendazole. Following number indicates dosage/kg of one therapy course.

\*\*\*BL: bladder lesion, TW: thickened wall, Irreg.: Bladder Wall Irregularity, PP: pseudo-polyp.

\*\*\*\*Decreased: ↓, Increased: ↑

**S1 Table J.** Main characteristics of included studies evaluating the impact of chemotherapy on prevalence of ultrasound abnormalities in the upper urinary tract

| Publication                        | Country    | Species* | Time follow-up (months) | Age      | Participants (Baseline/ follow-up) | Treatment**            | Method for assessing morbidity | Results***                                           |
|------------------------------------|------------|----------|-------------------------|----------|------------------------------------|------------------------|--------------------------------|------------------------------------------------------|
| Campagne G <i>et al.</i> 2001      | Niger      | Sh       | 34                      | 7-15     | 114/87                             | PZQ 40                 | Hydronephosis                  | ↓ from 27,19% to 4,6%                                |
| Delegue P <i>et al.</i> 1998       | Senegal    | Sh       | 4                       | All ages | 203/182                            | PZQ 40                 | Hydronephosis                  | ↓ from 2,5% to 0%                                    |
| Devidas A <i>et al.</i> 1989       | Niger      | Sh       | 10                      | All ages | 149/149                            | PZQ 40                 | Hydronephosis                  | ↓ from 48,9% to 17,4%                                |
| King CH <i>et al.</i> 1988         | Kenya      | Sh       | 12                      | 4-21     | 363/363                            | PZQ 40 or MET 30       | Hydronephosis                  | ↑ from 14,05% to 16%                                 |
| King CH <i>et al.</i> 2002         | Kenya      | Sh       | 9                       | 4-23     | 1: 99/99<br>2: 101/101             | 1: PZQ 20<br>2: PZQ 40 | Hydronephosis                  | ↓ 1: from 35,4% to 21,2%<br>↓ 2: from 34,6% to 19,8% |
| Rasendramino MH <i>et al.</i> 1998 | Madagascar | Sh       | 12                      | All ages | 472/472                            | PZQ 40                 | Hydronephosis                  | ↓ from 8,7% to 2,3%                                  |
| Tohon ZB <i>et al.</i> 2008        | Niger      | Sh       | 12                      | 7-11     | 1.409/1.409                        | PZQ 40 + ALB 400       | Hydronephosis                  | ↓ from 4% to 0,3%                                    |
| Traore M <i>et al.</i> 1998        | Mali       | Sh       | 12                      | All ages | 648/648                            | PZQ 40                 | Ureteral dilatation            | ↓ from 17% to 5%                                     |

\* Sh: *Schistosoma haematobium*

\*\* PZQ: Praziquantel, MET: Metrifonate, ALB: Albendazole. Following number indicates dosage/kg of one therapy course.

\*\*\*Decreased: ↓, Increased: ↑

**S1 Table K.** Main characteristics of included studies evaluating the impact of chemotherapy on blood hemoglobin

| Publication                         | Country      | Species* | Time follow-up (months) | Age                                                                            | Participants            | Treatment**                | Method for assessing morbidity         | Results*** Mean g/dL (SD)                                                                                                                                |
|-------------------------------------|--------------|----------|-------------------------|--------------------------------------------------------------------------------|-------------------------|----------------------------|----------------------------------------|----------------------------------------------------------------------------------------------------------------------------------------------------------|
| Awad El Karim MA <i>et al.</i> 1981 | Sudan        | S.m      | 12                      | 18-45, Selected (males/workers)                                                | HY:22<br>PLB:19         | HY 3                       | Venous blood                           | <b>HY</b> B: 14,1(0,9)<br>F: 15,2 (0,9)<br><b>PLB</b> B: 14,8 (1,3)<br>F: 15,3 (1,1)                                                                     |
| Kabatereine NB <i>et al.</i> 2007   | Uganda       | S.m      | 12/24                   | 6-14                                                                           | 1.852                   | PZQ 40 + ALB 400           | capillary blood<br>Finger prick method | B: 11,4 (2,15)<br>F (12): 11,7 (2,15)<br>F (24): 12 (2,15)                                                                                               |
| Ndamba J <i>et al.</i> 1993         | Zimbabwe     | S.m      | 4                       | 20-54 Selected (males/workers)                                                 | PZQ:287<br>CON:210      | PZQ 40                     | Venous blood                           | <b>PZQ</b> B: 14,1 (2,9)<br>F: 14,3 (2,8)<br><b>CON</b> B: 14,5 (1,7)<br>F: 14,8 (2,7)                                                                   |
| Ayoya M <i>et al.</i> 2009          | Mali         | S.h      | 3                       | 7-12 Selected - All anemic<br>Hb:>7 and <12 g/dL                               | 97                      | PZQ 40                     | Venous blood                           | B: 10,37 (1,0)<br>F: 10,81 (0,8)                                                                                                                         |
| Beasley NMR <i>et al.</i> 1999      | Tanzania     | S.h      | 4                       | 7-12 Selected - infected with both S.h and at least one species of geohelminth | PZQ:127<br>PLB:123      | PZQ 40 + ALB 400           | Venous blood                           | <b>PZQ</b> B: 11 (0,09)<br>F: 10,9 (0,08)<br><b>PLB</b> B: 11 (0,009)<br>F: 10,7 (0,1)                                                                   |
| Bhargava A <i>et al.</i> 2003       | Tanzania     | S.h      | 3/15                    | 9-15<br>Hb:>8g/dL                                                              | PZQ: 79<br>PZQ/ALB: 135 | PZQ 40<br>PZQ 40 + ALB 400 | Venous blood                           | <b>PZQ</b><br>B: 11,4 (1,3)<br>F (2): 11,4 (1,4)<br>F (15): 11,9 (1,3)<br><b>PZQ + ALB</b><br>B: 11,21 (1,5)<br>F (3): 11,56 (1,3)<br>F (15):12,09 (1,1) |
| Koukounari A <i>et al.</i> 2007     | Burkina Faso | S.h      | 12                      | 5-15                                                                           | 1.131                   | PZQ 40 + ALB 400           | capillary blood<br>Finger prick method | B: 10,97 (0,08)<br>F: 11,25 (0,07)                                                                                                                       |
| Latham MC <i>et al.</i> 1983        | Kenya        | S.h      | 4                       | Mean: 31,4 Selected (males/workers)                                            | MET:52<br>CON: 91       | MET 20                     | capillary blood<br>Finger prick method | <b>MET</b> B: 13,2 (1,7)<br>F: 13,6 (1,5)<br><b>CON</b> B: 12,7 (2)                                                                                      |

|                                     |             |     |   |                    |                                  |                     |                                        | F: 13,3 (2)                                                                                                                          |
|-------------------------------------|-------------|-----|---|--------------------|----------------------------------|---------------------|----------------------------------------|--------------------------------------------------------------------------------------------------------------------------------------|
| Mwanakasale<br>V <i>et al.</i> 2009 | Zambia      | S.h | 9 | 9-15               | 153/153                          | PZQ                 | Venous blood                           | B: 11,7 (1,5)<br>F: 12,6 (1,8)                                                                                                       |
| Sissoko MS <i>et al.</i> 2009       | Mali        | S.h | 1 | 6-15               | 389                              | PZQ 40 + ALB<br>400 | Venous blood                           | B: 11,1 (1,5)<br>F: 13,3 (0,9)                                                                                                       |
| Stephenson<br>LS <i>et al.</i> 1989 | Kenya       | S.h | 8 | 6-17<br>Hb: >8g/dL | PZQ: 105<br>MET: 103<br>PLB: 104 | PZQ 40<br>MET 10    | capillary blood<br>Finger prick method | <b>PZQ</b> B:11,2 (0,11)<br>F: 11,2 (0,13)<br><b>MET</b> B:11,5(0,13)<br>F:11,6 (0,12)<br><b>PLB</b> B: 11,5(0,11)<br>F: 11,3 (0,13) |
| Stephenson<br>LS <i>et al.</i> 1985 | Kenya       | S.h | 6 | 6-15               | MET: 202<br>PLB: 198             | MET 7,5 (3x)        | capillary blood<br>Finger prick method | <b>MET</b> B:11,2(0,10)<br>F: 12,5 (0,8)<br><b>PLB</b> B: 11,3 (0,1)<br>F: 12,3 (0,8)                                                |
| McGarvey ST<br><i>et al.</i> 1996   | Philippines | S.j | 6 | 4-20               | PZQ: 55<br>PLB: 61               | PZQ 50              | Capillary or venous<br>blood           | <b>PZQ</b> B: 11,1 (1,9)<br>F: 11,2 (1,5)<br><b>PLB</b> B: 11,4 (2,2)<br>F: 10,3 (2,2)                                               |

\* Sm: *Schistosoma mansoni*, Sj: *Schistosoma japonicum*, Sh: *Schistosoma haematobium*

\*\* PZQ: Praziquantel, ALB: Albendazole, HY: Hycanthon, MET: Metrifonate, CON: Control. Following number indicates dosage/kg of one therapy course.

\*\*\* B: Baseline, F: Follow-up



## Alphabetized list of full citations for papers included in S1 Tables A-K

1. Awad El Karim MA, Collins KJ, Sukkar MY, Omer AHS, Amin MA, Doré C. An assessment of anti-schistosomal treatment on physical work capacity. *J Trop Med Hyg.* 1981; 84:67-72.
2. Ayoya MA, Spiekermann-Brouwer GM, Traore AK, Stoltzfus RJ, Habicht JP, Garza C. Multiple micronutrients including iron are not more effective than iron alone for improving hemoglobin and iron status of Malian school children. *J Nutr.* 2009;139(10):1972–9.
3. Beasley NMR, Tomkins AM, Hall A, Kihamia CM, Lorri W, Nduma B, et al. The impact of population level deworming on the haemoglobin levels of schoolchildren in Tanga, Tanzania. *Trop Med Int Heal.* 1999;4(11):744–50.
4. Berhe N, Myrvang B, Gundersen SG. Reversibility of schistosomal periportal thickening/fibrosis after praziquantel therapy: a twenty-six month follow-up study in Ethiopia. *Am J Trop Med Hyg.* 2008;78(2):228–34.
5. Betson M, Sousa-Figueiredo JC, Kabatereine NB, Stothard JR. Use of fecal occult blood tests as epidemiologic indicators of morbidity associated with intestinal schistosomiasis during preventive chemotherapy in young children. *Am J Trop Med Hyg.* 2012;87(4):694–700.
6. Bhargava A, Jukes M, Lambo J, Kihamia CM, Lorri W, Nokes C, et al. Anthelmintic treatment improves the hemoglobin and serum ferritin concentrations of Tanzanian schoolchildren. *Food Nutr Bull.* 2003;24(4):332–42.
7. Boisier P, Ramarokoto CE, Ravaoalimalala VE, Rabarijaona L, Serieye J, Roux J, Esterre P. Reversibility of *Schistosoma mansoni*-associated morbidity after yearly mass praziquantel therapy: ultrasonographic assessment. *Trans R Soc Trop Med Hyg.* 1998;92(4):451–3.
8. Butterworth AE, Sturrock RF, Ouma JH, Mbugua GG, Fulford AJC, Kariuki HC, et al. Comparison of different chemotherapy strategies against schistosoma-mansoni in Machakos district, Kenya - effects on human infection and morbidity. *Parasitology.* 1991;103(3):339–55.
9. Campagne G, Garba a, Barkiré H, Vera C, Sidiki a, Chippaux JP. Continued ultrasonic follow-up of children infected with *Schistosoma haematobium* after treatment with praziquantel. *Trop Med Int Health.* 2001;6(1):24–30.
10. Carlton EJ, Hsiang M, Zhang Y, Johnson S, Hubbard A, Spear RC. The impact of *Schistosoma japonicum* infection and treatment on ultrasound-detectable morbidity: a five-year cohort study in Southwest China. *PLoS Negl Trop Dis.* 2010;4(5):e685.
11. Cook JA, Jordan P, Woodstock L, Pilgrim V. A controlled trial of hycanthon and placebo in schistosomiasis mansoni in St. Lucia. *Ann Trop Med Parasitol.* 1977;71(2):197-203.
12. Cota GF, Pinto-Silva RA, Antunes CMF, Lambertucci JR. Ultrasound and clinical investigation of hepatosplenic schistosomiasis: Evaluation of splenomegaly and liver fibrosis four years after mass chemotherapy with oxamniquine. *Am J Trop Med Hyg.* 2006;74(1):103–7.
13. Delegue P, Picquet M, DJ S, Vercruysse J, Sambou B, Ly A. Morbidity induced by *Schistosoma haematobium* infections, as assessed by ultrasound before and after treatment with praziquantel, in a recently expanded focus (Senegal River basin). *Ann Trop Med Parasitol.* 1998;92(7):775–83.
14. DeStigter KV, King CH, Keating CE, Ouma JH, Siongok TK, Mahmoud AF. Effects of targeted mass treatment on intensity of infection and morbidity in scistosomiasis mansoni: seven-year follow-up of a community in machakos, kenya. *Trans Assoc Am Physicians.* 1989;102:209–12.
15. Devidas A, Lamothe F, Develoux M, Mouchet F, Sellin B. Ultrasonographic assessment of the regression of bladder and renal lesions due to *Schistosoma haematobium* after treatment with praziquantel. *Ann Soc Belg Med Trop.* 1989;69(1):57–65.
16. Doehring E, Ehrich JH, Bremer HJ. Reversibility of urinary tract abnormalities due to *Schistosoma haematobium* infection. *Kidney Int.* 1986;30(4):582–5.

17. Doehring-Schwerdtfeger E, Abdel-Rahim IM, Kardorff R, Kaiser C, Franke D, Schlake J, et al. Ultrasonographical investigation of periportal fibrosis in children with *Schistosoma mansoni* infection: Reversibility of morbidity twenty-three months after treatment with praziquantel. *Am J Trop Med Hyg.* 1992;46(4):409–15.
18. Frenzel K, Grigull L, Odongo-Aginya E, Ndugwa CM, Loroni-Lakwo T, Schweigmann U, et al. Evidence for a long-term effect of a single dose of praziquantel on *Schistosoma mansoni*-induced hepatosplenic lesions in northern Uganda. *Am J Trop Med Hyg.* 1999;60(6):927–31.
19. Gryseels B, Nkulikyinka L, Engels D. Impact of repeated community-based selective chemotherapy on morbidity due to schistosomiasis mansoni. *Am J Trop Med Hyg.* 1994;51(5):634–41.
20. Hadidjaja P, Syamsuddin N, Ismid IS, Sudomo M, Campbell J, Putrali J. The impact of schistosomiasis mass treatment on hepato-splenomegaly in Napu Valley, Central Sulawesi, Indonesia. *Southeast Asian J Trop Med Public Health.* 1985;16(3):401–4.
21. Hatz C, Mayombana C, Savigny D, MacPherson CNL, Koella JC, Degrémont A, Tanner M. Ultrasound scanning for detecting morbidity due to *Schistosoma haematobium* and its resolution following treatment with different doses of praziquantel. *Trans R Soc Trop Med Hyg.* 1990;84:84-88.
22. Homeida MA, El Tom I, Nash T, Bennett JL. Association of the therapeutic activity of praziquantel with the reversal of Symmers' fibrosis induced by *Schistosoma mansoni*. *Am J Trop Med Hyg.* 1991;45(3):360–5.
23. Kabatereine NB, Brooker S, Koukounari A, Kazibwe F, Tukahebwa EM, Fleming FM, et al. Impact of a national helminth control programme on infection and morbidity in Ugandan schoolchildren. *Bull World Health Organ.* 2007;85(2):91–9.
24. Kahama AI, Odek AE, Kihara RW, Vennervald BJ, Kombe Y, Nkulila T, et al. Urine circulating soluble egg antigen in relation to egg counts, hematuria, and urinary tract pathology before and after treatment in children infected with *Schistosoma haematobium* in Kenya. *Am J Trop Med Hyg.* 1999;61(2):215–9.
25. Kiliku FM, Kimura E, Muhoho N, Migwi DK, Katsumata T. The usefulness of urinalysis reagent strips in selecting *Schistosoma haematobium* egg positives before and after treatment with praziquantel. *J Trop Med Hyg.* 1991;94(6):401–6.
26. King CH, Lombardi G, Lombardi C, Greenblatt R, Hodder S, Kinyanjui H, et al. Chemotherapy-based control of schistosomiasis haematobia. II. Metrifonate vs. praziquantel in control of infection-associated morbidity. *Am J Trop Med Hyg.* 1990;42(6):587–95.
27. King CH, Lombardi G, Lombardi C, Greenblatt R, Hodder S, Kinyanjui H, et al. Chemotherapy-based control of schistosomiasis haematobia. I. Metrifonate versus praziquantel in control of intensity and prevalence of infection. *Am J Trop Med Hyg.* 1988;39(3):295–305.
28. King CH, Muchiri EM, Mungai P, Ouma JH, Kadzo H, Magak P, et al. Randomized comparison of low-dose versus standard-dose praziquantel therapy in treatment of urinary tract morbidity due to *Schistosoma haematobium* infection. *Am J Trop Med Hyg.* 2002;66(6):725–30.
29. Kitange HM, Swai ABM, McLarty DG, Alberti KGMM. Schistosomiasis prevalence after administration of praziquantel to school children in Melela village, Morogoro region, Tanzania. *East Afr Med J.* 1993;70(12):782–6.
30. Kongs A, Verle P, Dieng A, Talla I, Rouquet P. Clinical investigation of a population recently infected with *Schistosoma mansoni* (Richard-Toll, Senegal). *Trop Med Int Heal.* 1996;1(2):191–8.
31. Koukounari A, Donnelly CA, Sacko M, Keita AD, Landouré A, Dembelé R, et al. The impact of single versus mixed schistosome species infections on liver, spleen and bladder morbidity within Malian children pre- and post-praziquantel treatment. *BMC Infect Dis.* 2010;10:227.
32. Koukounari A, Gabrielli AF, Toure S, Bosque-Oliva E, Zhang Y, Sellin B, et al. *Schistosoma haematobium* infection and morbidity before and after large-scale administration of praziquantel in Burkina Faso. *J Infect Dis.* 2007;196(5):659–69.
33. Latham MC, Stephenson LS, Hall A, Wolgemuth JC, Elliot TC, Crompton DET. Parasitic infections, anaemia and nutritional status: a study of their interrelationships and the effect of prophylaxis and treatment on workers in Kwale District, Kenya. *Trans R Soc Trop Med Hyg.* 1983;77(1):411-48.

34. Li YS, Sleight AC, Li Y, Tanner M, Dessein A, Williams GM, et al. Five-year impact of repeated praziquantel treatment on subclinical morbidity due to *Schistosoma japonicum* in China. *Trans R Soc Trop Med Hyg.* 2002;96(4):438–43.
35. Li YS, Sleight AC, Ross AG, Li Y, Williams GM, Tanner M, et al. Two-year impact of praziquantel treatment for *Schistosoma japonicum* infection in China: re-infection, subclinical disease and fibrosis marker measurements. *Trans R Soc Trop Med Hyg.* 2000;94(2):191–7.
36. Martins-Leite P, Gazzinelli G, Alves-Oliveira LF, Gazzinelli A, Malaquias LCC, Correa-Oliveira R, et al. Effect of chemotherapy with praziquantel on the production of cytokines and morbidity associated with schistosomiasis mansoni. *Antimicrob Agents Chemother.* 2008;52(8):2780–6.
37. McGarvey ST, Aligui G, Graham KK, Peters P, Olds GR, Olveda R. Schistosomiasis japonica and childhood nutritional status in northeastern Leyte, the Philippines: a randomized trial of praziquantel versus placebo. *Am J Trop Med Hyg.* 1996;54(5):498–502.
38. Mekonnen A, Legesse M, Belay M, Tadesse K, Torben W, Teklemariam Z, et al. Efficacy of Praziquantel against *Schistosoma haematobium* in Dulshatalo village, western Ethiopia. *BMC Res Notes.* 2013;6(1):392.
39. Mott KE, Dixon H, Osei-Tutu E, England EC, Davis A. Effect of praziquantel on hematuria and proteinuria in urinary schistosomiasis. *Am Soc Trop Med Hyg.* 1985;34(6):1119–26.
40. Mwanakasale V, Siziya S, Mwansa J, Koukounari A, Fenwick A. Impact of iron supplementation on schistosomiasis control in Zambian school children in a highly endemic area. *Malawi Med J.* 2009;21(1):12–8.
41. Ndamba J, Makaza N, Munjoma M, Gomo E, Kaondera KC. The physical fitness and work performance of agricultural workers infected with *Schistosoma mansoni* in Zimbabwe. *Ann Trop Med Parasitol.* 1993;87(6):553–561.
42. Peixinho EL, André B, Bina JC. Sintomatologia intestinal na fase crônica da esquistossomose mansoni. *Rev Soc Bras Med Trop.* 1986;19(1):27–30.
43. Rahoud SA, Mergani A, Khamis AH, Saeed OK, Mohamed-Ali Q, Dessein AJ, et al. Factors controlling the effect of praziquantel on liver fibrosis in *Schistosoma mansoni*-infected patients. *FEMS Immunol Med Microbiol.* 2010;58(1):106–12.
44. Ramarakoto CE, Leutscher PDC, Van Dam G, Christensen NO. Ultrasonographical findings in the urogenital organs in women and men infected with *Schistosoma haematobium* in northern Madagascar. *Trans R Soc Trop Med Hyg.* 2008;102(8):767–73.
45. Rasendramino MH, Rajaona HR, Ramarakoto VE, Leutscher P, Cordonnier D, Esterre P. Effect du praziquantel sur les retentissements uro-néphrologiques de la bilharziose urinaire. *Néphrologie.* 1998;19(6):347–51.
46. Reimert CM, Mshinda HM, Hatz CF, Kombe Y, Nkulila T, Poulsen LK, et al. Quantitative assessment of eosinophiluria in *Schistosoma haematobium* infections: A new marker of infection and bladder morbidity. *Am J Trop Med Hyg.* 2000;62(1):19–28.
47. Ruiz-Guevara R, de Noya BA, Valero SK, Lecuna P, Garassini M, Noya O. Clinical and ultrasound findings before and after praziquantel treatment among Venezuelan schistosomiasis patients. *Rev Soc Bras Med Trop.* 2007;40(5):505–11.
48. Sarda RK, Kihamia CM, Minjas JN, Mahikwano LF. Haematuria and proteinuria in urinary schistosomiasis: response to therapy with praziquantel in Tanzanian children. *Trop Med Parasitol.* 1987;38(1):31–3.
49. Sissoko MS, Dabo A, Traore H, Diallo M, Traore B, Konate D, et al. Efficacy of artesunate + sulfamethoxypyrazine/pyrimethamine versus praziquantel in the treatment of *Schistosoma haematobium* in children. *PLoS One.* United States; 2009;4(10):e6732.
50. Sleight AC, Mott KE, Hoff R, Maguire JH, da França Silva JT. Manson's schistosomiasis in Brazil: 11-year evaluation of successful disease control with oxamniquine. *Lancet.* 1986;1:635–7.
51. Stephenson LS, Kurz KM, Kinoti SN, Oduori ML, Crompton DW. Relationships of *Schistosoma haematobium*, hookworm and malarial infections and metrifonate treatment to hemoglobin level in Kenyan school children. *Am J Trop Med Hyg.* 1985;34(3):519–28.

52. Stephenson LS, Kinoti SN, Latham MC, Kurz KM, Kyobe J. Single dose metrifonate or praziquantel treatment in Kenyan children. I. Effects on *Schistosoma haematobium*, hookworm, hemoglobin levels, splenomegaly, and hepatomegaly. *Am-J-Trop-Med-Hyg.* 1989;41(4):436–44.
53. Stephenson LS, Latham MC, Kinoti SN, Oduori ML. Regression of splenomegaly and hepatomegaly in children treated for *Schistosoma haematobium* infection. *Am J Trop Med Hyg.* 1985;34(1):119–23.
54. Stephenson LS, Latham MC, Kinoti SN, Oduori ML. Sensitivity and specificity of reagent strips in screening of Kenyan children for *Schistosoma haematobium* infection. *Am J Trop Med Hyg.* 1984;33(5):862–71.
55. Stete K, Krauth SJ, Coulibaly JT, Knopp S, Hattendorf J, Müller I, et al. Dynamics of *Schistosoma haematobium* egg output and associated infection parameters following treatment with praziquantel in school-aged children. *Parasit Vectors.* 2012;5(1):298.
56. Sukwa TY, Bulsara MK, Wurapa FK. Reduction in prevalence, intensity of infection and morbidity due to schistosoma mansoni infection in a community following treatment with praziquantel. *J Trop Med Hyg.* 1987;90(4):205-11.
57. Sukwa TY. A community-based randomized trial of praziquantel to control schistosomiasis morbidity in schoolchildren in Zambia. *Ann Trop Med Parasitol.* 1993;87(2):185–94.
58. Sukwa TY, Boatman BA, Wurapa FK. A three year follow-up of chemotherapy with praziquantel in a rural Zambian community endemic for schistosomiasis mansoni. *Trans R Soc Trop Med Hyg.* 1988;82(2):258–60.
59. Tohon ZB, Mainassara HB, Garba A, Mahamane AE, Bosqué-Oliva E, Ibrahim ML, et al. Controlling schistosomiasis: Significant decrease of anaemia prevalence one year after a single dose of praziquantel in Nigerien schoolchildren. *PLoS Negl Trop Dis.* 2008;2(5):e241.
60. Traore M, Traore HA, Kardorff R, Diarra A, Landoure A, Vester U, et al. The public health significance of urinary schistosomiasis as a cause of morbidity in two districts in Mali. *Am J Trop Med Hyg.* 1998;59(3):407–13.
61. Vennervald BJ, Booth M, Butterworth AE, Kariuki HC, Kadzo H, Ileri E, et al. Regression of hepatosplenomegaly in Kenyan school-aged children after praziquantel treatment and three years of greatly reduced exposure to *Schistosoma mansoni*. *Trans R Soc Trop Med Hyg.* 2005;99(2):150–60.
62. Wagatsuma Y, Aryeetey ME, Sack DA, Morrow RH, Hatz C, Kojima S. Resolution and resurgence of schistosoma haematobium-induced pathology after community-based chemotherapy in Ghana, as detected by ultrasound. *J Infect Dis.* 1999;179(6):1515–22.
63. Wiest PM, Wu G, Zhong S, McGarvey ST, Yuan J, Olveda RM, et al. Impact of annual screening and chemotherapy with praziquantel on schistosomiasis japonica on Jishan Island, People's Republic of China. *Am J Trop Med Hyg.* 1994;51(2):162–9.
64. Zhao G, Jiang Q, Wasley A, Zhang S, Wu Z, Liu Z, Yuan H. Changes in prevalence, intensity of infection and morbidity due to *Schistosoma japonicum* infection in a community following a single treatment with praziquantel. *Trop Geogr Med.* 1995;47(6):289-292.
