# Supplementary material for: Decline in infection-related morbidities following drug-mediated reductions in the intensity of Schistosoma infection: A systematic review and meta-analysis
Source: PubMed Central journal article supplement (PMC5333910; doi:10.1371/journal.pntd.0005372), 2017-02-17
Supplement: pntd.0005372.s005.pdf [file pntd.0005372.s005.pdf]

**S3 Table A.** Analysis of the prevalence of hepatomegaly before and after treatment, stratified by subgroups

| Subgroup                    | Study (N) | Association      |                  | Heterogeneity test |              |                | Study References (see listing pp. 7-10) |
|-----------------------------|-----------|------------------|------------------|--------------------|--------------|----------------|-----------------------------------------|
|                             |           | OR (95% CI)      | P value (Z test) | Q                  | P value      | I <sup>2</sup> |                                         |
| <b>Right hepatic lobe</b>   |           |                  |                  |                    |              |                |                                         |
| Clinical diagnosis          | 8         | 0,54 (0,29-1,00) | 0,053            | 57,01              | <0,001       | 87,72%         | [31,52,53,56,57,64]                     |
| Ultrasound diagnosis        | 2         | 0,44 (0,21-0,95) | <b>0,036</b>     | 10,78              | <0,001       | 90,73%         | [10,63]                                 |
| Subjects of all ages        | 4         | 0,66 (0,36-1,22) | 0,187            | 53,21              | <0,001       | 94,36%         | [63,10,56,64]                           |
| School age subjects         | 6         | 0,39 (0,17-0,90) | <b>0,018</b>     | 20,81              | 0,001        | 75,98%         | [53,57, 31,52]                          |
| Endpoint (0-12 months)      | 8         | 0,55 (0,30-1,01) | 0,054            | 54,65              | <0,001       | 87,19%         | [53,63,64,57,31,52]                     |
| Endpoint (13-24 months)     | 3         | 0,43 (0,30-0,60) | < <b>0,001</b>   | 7,79               | 0,020        | 74,33%         | [10,56,63]                              |
| Endpoint (>25 months)       | 2         | 0,22 (0,13-0,38) | < <b>0,001</b>   | 3,69               | 0,055        | 72,93%         | [10,58]                                 |
| <i>S.mansoni</i>            | 3         | 0,24 (0,06-0,93) | <b>0,039</b>     | 6,84               | 0,033        | 70,77%         | [56,57]                                 |
| <i>S.japonicum</i>          | 3         | 0,69 (0,28-1,65) | 0,408            | 50,40              | <0,001       | 96,03%         | [10,63,64]                              |
| <i>S.haematobium</i>        | 3         | 0,84 (0,46-1,54) | 0,585            | 3,48               | <b>0,175</b> | 42,61%         | [52,53]                                 |
| <i>S.m/S.h</i>              | 1         | 0,15 (0,06-0,36) | < <b>0,001</b>   | -                  | -            | -              | [31]                                    |
| All subjects infected (YES) | 5         | 0,51 (0,22-1,16) | 0,111            | 12,46              | 0,014        | 69,14%         | [53,57,52]                              |
| All subjects infected (NO)  | 5         | 0,52 (0,29-0,96) | <b>0,038</b>     | 64,97              | <0,001       | 93,84%         | [10,31,56,63,64]                        |
| China                       | 3         | 0,69 (0,28-1,65) | 0,408            | 50,40              | <0,001       | 96,03%         | [10,63,64]                              |
| East Africa                 | 3         | 0,84 (0,46-1,54) | 0,585            | 3,48               | <b>0,175</b> | 42,61%         | [52,53]                                 |
| West Africa                 | 1         | 0,15 (0,06-0,36) | < <b>0,001</b>   | -                  | -            | -              | [31]                                    |
| South Africa                | 3         | 0,24 (0,06-0,93) | <b>0,039</b>     | 6,84               | 0,033        | 70,77%         | [56,57]                                 |
| <b>Left hepatic lobe</b>    |           |                  |                  |                    |              |                |                                         |
| Clinical diagnosis          | 4         | 0,33 (0,21-0,53) | < <b>0,001</b>   | 17,05              | 0,001        | 82,40%         | [56,64,57]                              |
| Ultrasound diagnosis        | 6         | 0,59 (0,33-1,06) | 0,080            | 47,56              | <0,001       | 89,48%         | [17,63,10,35,23,31]                     |
| Subjects of all ages        | 5         | 0,53 (0,33-0,77) | <b>0,001</b>     | 29,02              | <0,001       | 86,22%         | [63,10,35,56,64]                        |
| School age subjects         | 5         | 0,37 (0,15-0,89) | <b>0,027</b>     | 41,15              | <0,001       | 90,28%         | [17,57,23,31]                           |
| Endpoint (0-12 months)      | 7         | 0,38 (0,23-0,61) | < <b>0,001</b>   | 50,65              | <0,001       | 88,15%         | [17,63,64,57,23,31]                     |
| Endpoint (13-24 months)     | 6         | 0,59 (0,36-0,96) | <b>0,034</b>     | 49,16              | <0,001       | 89,83%         | [17,63,10,35,56,23]                     |
| Endpoint (>25 months)       | 3         | 0,36 (0,05-2,47) | 0,303            | 97,79              | <0,001       | 97,95%         | [10,34,58]                              |
| <i>S.mansoni</i>            | 5         | 0,44 (0,23-0,85) | <b>0,015</b>     | 38,98              | <0,001       | 89,73%         | [17,23,56,57]                           |
| <i>S.japonicum</i>          | 4         | 0,53 (0,32-0,87) | <b>0,013</b>     | 28,55              | <0,001       | 89,49%         | [10,35,63,64]                           |
| <i>S.m/S.h</i>              | 1         | 0,16 (0,03-0,73) | <b>0,018</b>     | -                  | -            | -              | [31]                                    |
| All subjects infected (YES) | 3         | 0,28 (0,13-0,63) | <b>0,002</b>     | 11,20              | 0,004        | 82,14%         | [17,57]                                 |
| All subjects infected (NO)  | 7         | 0,57 (0,38-0,85) | <b>0,006</b>     | 48,82              | <0,001       | 87,71%         | [63,10,35,56,64,23, 31]                 |
| China                       | 4         | 0,53 (0,32-0,87) | <b>0,013</b>     | 28,55              | <0,001       | 89,49%         | [10,35,63,64]                           |
| South Africa                | 3         | 0,28 (0,13-0,61) | <b>0,001</b>     | 15,58              | <0,001       | 87,16%         | [56,57]                                 |
| East Africa                 | 1         | 1,25 (0,82-1,90) | 0,287            | -                  | -            | -              | [23]                                    |
| West Africa                 | 1         | 0,16 (0,03-0,73) | <b>0,018</b>     | -                  | -            | -              | [31]                                    |
| Egypt / Sudan               | 1         | 0,60 (0,34-1,05) | 0,074            | -                  | -            | -              | [17]                                    |
| <b>Lobe not specified</b>   |           |                  |                  |                    |              |                |                                         |
| Endpoint (0-12 months)      | 6         | 0,40 (0,18-0,89) | <b>0,026</b>     | 140                | <0,001       | 96,42%         | [8,19,20,50]                            |
| Endpoint (13-24 months)     | 5         | 0,45 (0,18-1,15) | 0,097            | 142                | <0,001       | 97,19%         | [8,19,50]                               |
| Endpoint (>25 months)       | 8         | 0,32 (0,14-0,75) | <b>0,009</b>     | 209                | <0,001       | 96,65%         | [8,14,19,22,47,50]                      |
| Subjects of all ages        | 6         | 0,55 (0,30-1,02) | 0,060            | 71,09              | <0,001       | 92,96%         | [14,19,20,47,50]                        |
| School age subjects         | 2         | 0,13 (0,09-0,20) | < <b>0,001</b>   | 0,29               | <b>0,585</b> | 0%             | [8]                                     |
| Specific subjects           | 1         | 0,22 (0,09-0,54) | <b>0,001</b>     | -                  | -            | -              | [22]                                    |

|                             |   |                  |              |      |        |        |               |
|-----------------------------|---|------------------|--------------|------|--------|--------|---------------|
| All subjects infected (YES) | 4 | 0,29 (0,12-0,67) | <b>0,004</b> | 28,6 | <0,001 | 89,5%  | [8,20,47]     |
| All subjects infected (NO)  | 5 | 0,45 (0,21-0,96) | <b>0,040</b> | 72,4 | <0,001 | 94,4%  | [14,19,22,50] |
| East da África              | 5 | 0,35 (0,13-0,92) | <b>0,034</b> | 136  | <0,001 | 97,06% | [8,14,19]     |
| South America               | 2 | 0,41 (0,12-1,44) | 0,167        | 7,87 | 0,005  | 87,3%  | [47,50]       |
| Indonesia                   | 1 | 0,49 (0,31-0,77) | <b>0,002</b> | -    | -      | -      | [20]          |
| Egypt / Sudan               | 1 | 0,22 (0,09-0,54) | <b>0,001</b> | -    | -      | -      | [22]          |

**S3 Table B.** Analysis of the prevalence of splenomegaly before and after treatment, stratified by subgroups

| Subgroup                    | Study (N) | Association      |                  | Q      | Heterogeneity test |                  | Study References (see listing pp. 7-10)  |
|-----------------------------|-----------|------------------|------------------|--------|--------------------|------------------|------------------------------------------|
|                             |           | OR (95% CI)      | P value (Z test) |        | OR (95% CI)        | P value (Z test) |                                          |
| Clinical diagnosis          | 16        | 0,67 (0,50-0,90) | <b>0,009</b>     | 98,80  | <0,001             | 84,81%           | [47,50,52,53,22,14,56,64,57,11,31,19,20] |
| Ultrasound diagnosis        | 5         | 0,52(0,19-1,38)  | 0,192            | 54,73  | <0,001             | 92,69%           | [12,17,63,10,35]                         |
| Subjects of all ages        | 11        | 0,61 (0,43-0,87) | <b>0,007</b>     | 89,97  | <0,001             | 86,66%           | [10,14,19,20,35,47,50,56,63,64]          |
| School age subjects         | 8         | 0,66 (0,37-1,19) | 0,171            | 67,78  | <0,001             | 89,77%           | [11,17,31,52,53,57]                      |
| Specific subjects           | 2         | 0,53 (0,30-0,92) | <b>0,025</b>     | 0,102  | <b>0,750</b>       | 0%               | [12,22]                                  |
| Endpoint (0-12 months)      | 13        | 0,78 (0,58-1,06) | 0,125            | 85,83  | <0,001             | 86,01%           | [11,17,19,20,31,50,52,53,57,64]          |
| Endpoint (13-24 months)     | 9         | 0,47 (0,27-0,81) | <b>0,007</b>     | 137,04 | <0,001             | 94,16%           | [10,17,19,35,56,63]                      |
| Endpoint (>25 months)       | 8         | 0,46 (0,26-0,79) | <b>0,006</b>     | 40,55  | <0,001             | 82,73%           | [10,12,14,19,22,47,50]                   |
| <i>S.mansoni</i>            | 12        | 0,65 (0,47-0,88) | <b>0,007</b>     | 46,05  | <0,001             | 76,11%           | [12,17,47,50,22,14,56,57,11,19]          |
| <i>S.japonicum</i>          | 5         | 0,56 (0,26-1,23) | 0,152            | 55,54  | <0,001             | 92,79%           | [63,10,35,64,20]                         |
| <i>S.haematobium</i>        | 3         | 1,13 (0,49-2,50) | 0,797            | 15,93  | <0,001             | 87,45%           | [52,53]                                  |
| <i>S.m/S.h</i>              | 1         | 0,26 (0,18-0,37) | <b>&lt;0,001</b> | -      | -                  | -                | [31]                                     |
| All subjects infected (YES) | 9         | 0,74 (0,46-1,19) | 0,215            | 35,9   | <0,001             | 77,71%           | [12,17,47,52,53,57,11]                   |
| All subjects infected (NO)  | 12        | 0,57 (0,38-0,83) | <b>0,004</b>     | 121    | <0,001             | 90,94%           | [50,63,10,22,35,14,56,64,31,19,20]       |
| China                       | 4         | 0,47 (0,17-1,32) | 0,156            | 46,75  | <0,001             | 93,58%           | [10,35,63,64]                            |
| East Africa                 | 6         | 0,97 (0,67-1,42) | 0,906            | 25,19  | <0,001             | 80,15%           | [14,19,52,53]                            |
| Egypt/Sudan                 | 2         | 0,81 (0,35-1,87) | 0,627            | 5,25   | 0,022              | 80,96%           | [17,22]                                  |
| South Africa                | 3         | 0,42 (0,26-0,68) | <b>&lt;0,001</b> | 3,92   | <b>0,140</b>       | 49,05%           | [56,57]                                  |
| South America               | 3         | 0,61 (0,36-1,03) | 0,066            | 0,88   | <b>0,644</b>       | 0%               | [12,47,50]                               |
| Caribbean                   | 1         | 1,00 (0,12-8,12) | 1,000            | -      | -                  | -                | [11]                                     |
| Indonesia                   | 1         | 1,05 (0,73-1,50) | 0,784            | -      | -                  | -                | [20]                                     |

**S3 Table C.** Analysis of the prevalence of periportal fibrosis before and after treatment, stratified by subgroups

| Subgroup                    | Study (N) | Association       |                  | Heterogeneity test |              |                | Study References (see listing pp. 7-10) |
|-----------------------------|-----------|-------------------|------------------|--------------------|--------------|----------------|-----------------------------------------|
|                             |           | OR (95% CI)       | P value (Z test) | Q                  | P value      | I <sup>2</sup> |                                         |
| Subjects of all ages        | 7         | 0,52 (0,39-0,69)  | <b>&lt;0,001</b> | 17,92              | 0,006        | 66,48%         | [10,18,35,36,47,63]                     |
| School age subjects         | 1         | 0,48 (0,33-0,68)  | <b>&lt;0,001</b> | -                  | -            | -              | [23]                                    |
| Specific subjects           | 4         | 0,04 (0,003-0,67) | <b>0,025</b>     | 16,97              | 0,001        | 82,32%         | [4,12,22,43]                            |
| Endpoint (0-12 months)      | 5         | 0,59 (0,43-0,81)  | <b>0,001</b>     | 12,53              | 0,014        | 68,09%         | [17,18,22,36,63]                        |
| Endpoint (13-24 months)     | 5         | 0,66 (0,47-0,93)  | <b>0,017</b>     | 10,53              | 0,032        | 62,03%         | [10,17,22,35,63]                        |
| Endpoint (>25 months)       | 9         | 0,28 (0,14-0,54)  | <b>&lt;0,001</b> | 44,74              | <0,001       | 82,12%         | [4,10,12,18,22,35,43,47]                |
| <i>S.mansoni</i>            | 9         | 0,35 (0,23-0,54)  | <b>&lt;0,001</b> | 27,91              | <0,001       | 71,34%         | [4,12,17,18,22,36,43,47]                |
| <i>S.japonicum</i>          | 3         | 0,67 (0,41-1,09)  | 0,113            | 8,91               | 0,012        | 77,56%         | [10,35,63]                              |
| All subjects infected (YES) | 5         | 0,52 (0,36-0,75)  | <b>&lt;0,001</b> | 14,15              | 0,007        | 71,73%         | [12,17,36,43,47]                        |
| All subjects infected (NO)  | 7         | 0,33 (0,17-0,65)  | <b>0,002</b>     | 23,51              | 0,001        | 74,48%         | [4,10,18,22,35,63]                      |
| China                       | 3         | 0,67 (0,41-1,09)  | 0,113            | 8,91               | 0,012        | 77,56%         | [10,35,63]                              |
| East Africa                 | 3         | 0,32 (0,14-0,74)  | <b>0,008</b>     | 12,95              | 0,002        | 84,55%         | [4,18]                                  |
| Egypt/Sudan                 | 3         | 0,10 (0,008-1,32) | 0,081            | 9,10               | 0,011        | 78,02%         | [17,22,10]                              |
| South America               | 3         | 0,38 (0,16-0,87)  | <b>0,022</b>     | 5,67               | <b>0,059</b> | 64,74%         | [12,36,47]                              |

**S3 Table D.** Analysis of the prevalence of dilated portal vein before and after treatment, stratified by subgroups

| Subgroup                | Study (N) | Association      |                  | Heterogeneity test |              |                | Study References (see listing pp. 7-10) |
|-------------------------|-----------|------------------|------------------|--------------------|--------------|----------------|-----------------------------------------|
|                         |           | OR (95% CI)      | P value (Z test) | Q                  | P value      | I <sup>2</sup> |                                         |
| Subjects of all ages    | 2         | 0,99 (0,49-2,00) | 0,986            | 3,83               | 0,05         | 73,94%         | [10,35]                                 |
| School age subjects     | 1         | 0,10 (0,03-0,30) | <b>&lt;0,001</b> | -                  | -            | -              | [23]                                    |
| Specific subjects       | 1         | 0,79 (0,30-2,05) | 0,628            | -                  | -            | -              | [61]                                    |
| <i>S. mansoni</i>       | 2         | 0,29 (0,04-2,10) | 0,222            | 3,83               | 0,050        | 73,94%         | [23,61]                                 |
| <i>S. japonicum</i>     | 2         | 0,99 (0,49-2,00) | 0,986            | 7,66               | 0,006        | 86,95%         | [10,35]                                 |
| Endpoint (0-12 months)  | 3         | 0,29 (0,04-2,10) | 0,222            | 7,66               | 0,006        | 86,95%         | [23,61]                                 |
| Endpoint (13-24 months) | 4         | 0,59 (0,25-1,40) | 0,236            | 19,31              | <0,001       | 84,46%         | [10,35,61,23]                           |
| Endpoint (>25 months)   | 2         | 0,34 (0,17-1,03) | 0,057            | 1,83               | <b>0,175</b> | 45,58%         | [34,61]                                 |
| Treatment 1x            | 4         | 0,57 (0,23-1,42) | 0,232            | 20,72              | <0,001       | 85,53%         | [10,35,61,23]                           |
| Treatment 2x            | 3         | 0,26 (0,10-0,62) | <b>0,002</b>     | 4,61               | <b>0,099</b> | 56,67%         | [12,61,23]                              |

**S3 Table E.** Analysis of the prevalence of diarrhea before and after treatment, stratified by subgroups

| Subgroup                    | Study (N) | Association       |                  | Heterogeneity test |              |                | Study References (see listing pp. 7-10) |
|-----------------------------|-----------|-------------------|------------------|--------------------|--------------|----------------|-----------------------------------------|
|                             |           | OR (95% CI)       | P value (Z test) | Q                  | P value      | I <sup>2</sup> |                                         |
| Subjects of all ages        | 4         | 0,50 (0,34-0,74)  | <b>0,001</b>     | 21,42              | <0,001       | 85,9%          | [56,30,19]                              |
| School age subjects         | 2         | 0,06 (0,02-0,15)  | <b>&lt;0,001</b> | 0,46               | <b>0,494</b> | 0%             | [11,42]                                 |
| Specific population         | 1         | 0, 69 (0,50-0,93) | <b>0,018</b>     | -                  | -            | -              | [5]                                     |
| Endpoint (0-12 months)      | 5         | 0,44 (0,26-0,73)  | <b>0,002</b>     | 28,13              | <0,001       | 85,78%         | [5,11,19,42]                            |
| Endpoint (13-24 months)     | 5         | 0,60 (0,32-1,13)  | 0,115            | 86,98              | <0,001       | 95,40%         | [5,56,30,19]                            |
| Endpoint (>25 months)       | 2         | 0,39 (0,26-0,57)  | <b>&lt;0,001</b> | 2,93               | <b>0,087</b> | 65,90%         | [19]                                    |
| All subjects infected (YES) | 3         | 0,13 (0,03-0,53)  | <b>0,004</b>     | 12,03              | 0,002        | 83,38%         | [11,30,42]                              |
| All subjects infected (NO)  | 4         | 0,60 (0,44-0,81)  | <b>0,001</b>     | 13,66              | 0,003        | 78,04%         | [5,56,19]                               |
| East Africa                 | 3         | 0,70 (0,60-0,82)  | <b>&lt;0,001</b> | 0,51               | <b>0,771</b> | 0%             | [5,19]                                  |
| Caribbean                   | 1         | 0,11 (0,01-0,65)  | <b>0,016</b>     | -                  | -            | -              | [11]                                    |
| South America               | 1         | 0,05 (0,02-0,15)  | <b>&lt;0,001</b> | -                  | -            | -              | [42]                                    |
| South Africa                | 1         | 0,37 (0,27-0,50)  | <b>&lt;0,001</b> | -                  | -            | -              | [56]                                    |
| West Africa                 | 1         | 0,33 (0,23-0,47)  | <b>&lt;0,001</b> | -                  | -            | -              | [30]                                    |

**S3 Table F.** Analysis of the prevalence of blood in stool before and after treatment, stratified by subgroups

| Subgroup                    | Study (N) | Association      |                  | Heterogeneity test |              |                | Study References (see listing pp. 7-10) |
|-----------------------------|-----------|------------------|------------------|--------------------|--------------|----------------|-----------------------------------------|
|                             |           | OR (95% CI)      | P value (Z test) | Q                  | P value      | I <sup>2</sup> |                                         |
| Subjects of all ages        | 4         | 0,21 (0,08-0,57) | <b>0,002</b>     | 51,16              | <0,001       | 94,13%         | [7,56,30,64]                            |
| School age subjects         | 3         | 0,27 (0,17-0,41) | <b>&lt;0,001</b> | 3,48               | <b>0,175</b> | 42,64%         | [57,42]                                 |
| Specific population         | 1         | 0,48 (0,28-0,82) | <b>0,007</b>     | -                  | -            | -              | [5]                                     |
| Endpoint (0-12 months)      | 4         | 0,31 (0,21-0,46) | <b>&lt;0,001</b> | 6,42               | <b>0,093</b> | 53,29%         | [5,57,42]                               |
| Endpoint (13-24 months)     | 5         | 0,29 (0,13-0,67) | <b>0,004</b>     | 64,86              | <0,001       | 93,83%         | [5,7,56,30,64]                          |
| Endpoint (>25 months)       | 1         | 0,27 (1,16-0,44) | <b>&lt;0,001</b> | -                  | -            | -              | [7]                                     |
| All subjects infected (YES) | 4         | 0,22 (0,14-0,35) | <b>&lt;0,001</b> | 8,23               | 0,041        | 63,55%         | [5,7,56,64]                             |
| All subjects infected (NO)  | 4         | 0,29 (0,12-0,67) | <b>0,004</b>     | 34,39              | <0,001       | 91,27%         | [57,30,42]                              |
| East Africa                 | 2         | 0,26 (0,08-0,88) | <b>0,031</b>     | 8,88               | 0,003        | 88,74%         | [5,7]                                   |
| South Africa                | 3         | 0,25 (0,15-0,40) | <b>&lt;0,001</b> | 5,31               | <b>0,070</b> | 62,37%         | [56,57]                                 |
| China                       | 1         | 0,68 (0,52-0,89) | <b>0,006</b>     | -                  | -            | -              | [64]                                    |
| South America               | 1         | 0,13 (0,05-0,34) | <b>&lt;0,001</b> | -                  | -            | -              | [42]                                    |
| West Africa                 | 1         | 0,15 (0,10-0,24) | <b>&lt;0,001</b> | -                  | -            | -              | [30]                                    |

**S3 Table G.** Analysis of the prevalence of blood in urine before and after treatment, stratified by subgroups

| Subgroup                    | Study (N) | Association       |                  | Heterogeneity test |         |                | Study References (see listing pp. 7-10) |
|-----------------------------|-----------|-------------------|------------------|--------------------|---------|----------------|-----------------------------------------|
|                             |           | OR (95% CI)       | P value (Z test) | Q                  | P value | I <sup>2</sup> |                                         |
| Subjects of all ages        | 5         | 0,16 (0,12-0,22)  | < <b>0,001</b>   | 16,73              | 0,002   | 76,10%         | [39,45,25,13,62]                        |
| School age subjects         | 11        | 0,07 (0,04-0,11)  | < <b>0,001</b>   | 171,93             | <0,001  | 94,18%         | [24,26,32,54,55,49,59,29,48,9]          |
| Specific population         | 1         | 0,002 (0,00-0,03) | < <b>0,001</b>   | -                  | -       | -              | [38]                                    |
| All subjects infected (YES) | 10        | 0,07 (0,04-0,10)  | < <b>0,001</b>   | 70,93              | <0,001  | 87,31%         | [26,38,39,54,55,49,13,62,48]            |
| All subjects infected (NO)  | 7         | 0,14 (0,07-0,26)  | < <b>0,001</b>   | 142,54             | <0,001  | 95,79%         | [24,32,45,25,59,29,9]                   |
| Endpoint (0-6 months)       | 11        | 0,05 (0,03-0,10)  | < <b>0,001</b>   | 127,50             | <0,001  | 92,15%         | [9,13,24,25,38,39,48,49,54,55,62]       |
| Endpoint (7-12 months)      | 6         | 0,12 (0,06-0,21)  | < <b>0,001</b>   | 147,9              | <0,001  | 96,62%         | [26,29,32,45,59]                        |
| Endpoint (>12 months)       | 3         | 0,08 (0,05-0,15)  | < <b>0,001</b>   | 6,09               | 0,048   | 67,16%         | [9,24,62]                               |
| East Africa                 | 9         | 0,08 (0,04-0,16)  | < <b>0,001</b>   | 183,87             | <0,001  | 95,64%         | [24,26,38,54,45,25,29,48]               |
| West Africa                 | 8         | 0,09 (0,06-0,13)  | < <b>0,001</b>   | 51,31              | <0,001  | 86,35%         | [32,39,55,49,13,59,62,9]                |

**S3 Table H.** Analysis of the prevalence of protein in urine before and after treatment, stratified by subgroups

| Subgroup                    | Study (N) | Association      |                  | Heterogeneity test |         |                | Study References (see listing pp. 7-10) |
|-----------------------------|-----------|------------------|------------------|--------------------|---------|----------------|-----------------------------------------|
|                             |           | OR (95% CI)      | P value (Z test) | Q                  | P value | I <sup>2</sup> |                                         |
| Subjects of all ages        | 4         | 0,12 (0,03-0,45) | < <b>0,001</b>   | 192,47             | 0,002   | 98,45%         | [25,39,45,62]                           |
| School age subjects         | 6         | 0,11 (0,05-0,24) | < <b>0,001</b>   | 115,12             | <0,001  | 95,65%         | [26,29,48,54,55]                        |
| Specific population         | 1         | 0,17 (0,08-0,40) | < <b>0,001</b>   | -                  | -       | -              | [38]                                    |
| All subjects infected (YES) | 8         | 0,05 (0,02-0,10) | < <b>0,001</b>   | 122,1              | <0,001  | 97,01%         | [26,38,39,48,54,55,62]                  |
| All subjects infected (NO)  | 3         | 0,48 (0,15-1,52) | 0,216            | 67                 | <0,001  | 94,26%         | [25,29,45]                              |
| Endpoint (0-6 months)       | 7         | 0,05 (0,01-0,21) | < <b>0,001</b>   | 242,5              | <0,001  | 97,52%         | [25,38,39,48,54,55,62]                  |
| Endpoint (7-12 months)      | 4         | 0,24 (0,12-0,48) | < <b>0,001</b>   | 72,83              | <0,001  | 95,88%         | [26,29,45]                              |
| Endpoint (>12 months)       | 1         | 0,03 (0,02-0,04) | < <b>0,001</b>   | -                  | -       | -              | [62]                                    |
| East Africa                 | 8         | 0,16 (0,08-0,32) | < <b>0,001</b>   | 185,93             | <0,001  | 96,23%         | [25,26,29,38,45,48,54]                  |
| West Africa                 | 3         | 0,04 (0,02-0,08) | < <b>0,001</b>   | 7,89               | <0,001  | 74,68%         | [39,55,62]                              |

**S3 Table I.** Analysis of the prevalence of ultrasound abnormalities in the urinary bladder before and after treatment, stratified by subgroups

| Subgroup                    | Study (N) | Association           |                  | Heterogeneity test |         |                | Study References (see listing pp. 7-10) |
|-----------------------------|-----------|-----------------------|------------------|--------------------|---------|----------------|-----------------------------------------|
|                             |           | OR (95% CI)           | P value (Z test) | Q                  | P value | I <sup>2</sup> |                                         |
| Subjects of all ages        | 4         | 0,25 (0,13-0,49)      | <0,001           | 34,31              | 0,002   | 91,25%         | [13,15,45,60]                           |
| School age subjects         | 7         | 0,18 (0,12-0,26)      | <0,001           | 25,11              | <0,001  | 76,10%         | [9,24,27,28,46,59]                      |
| Specific population         | 4         | 0,009 (0,001-0,09)    | <0,001           | 32,89              | <0,001  | 90,87%         | [16,44,21]                              |
| All subjects infected (YES) | 9         | 0,07 (0,03-0,16)      | <0,001           | 54,19              | <0,001  | 85,23%         | [13,15,16,24,28,44,21]                  |
| All subjects infected (NO)  | 6         | 0,21 (0,13-0,34)      | <0,001           | 60,21              | <0,001  | 91,69%         | [9,27,45,46,59,60]                      |
| Endpoint (0-6 months)       | 9         | 0,10 (0,06-0,18)      | <0,001           | 40,38              | <0,001  | 80,19%         | [9,13,24,28,44,46,21]                   |
| Endpoint (7-12 months)      | 8         | 0,20 (0,13-0,31)      | <0,001           | 70,26              | <0,001  | 90,03%         | [15,16,24,27,45,46,59,60]               |
| Endpoint (>12 months)       | 3         | 0,39 (0,19-0,80)      | <0,001           | 12,27              | 0,002   | 83,70%         | [9,24,46]                               |
| East Africa                 | 9         | 0,11 (0,07-0,19)      | <0,001           | 47,65              | <0,001  | 83,21%         | [24,27,28,44,45,46,21]                  |
| West Africa                 | 5         | 0,23 (0,13-0,39)      | <0,001           | 37,90              | <0,001  | 89,44%         | [9,13,15,59,60]                         |
| Central Africa              | 1         | <0,001 (<0,001-0,008) | <0,001           | -                  | -       | -              | [16]                                    |

**S3 Table J.** Analysis of the prevalence of ultrasound abnormalities in the upper urinary tract before and after treatment, stratified by subgroups

| Subgroup                    | Study (N) | Association      |                  | Heterogeneity test |              |                | Study References (see listing pp. 7-10) |
|-----------------------------|-----------|------------------|------------------|--------------------|--------------|----------------|-----------------------------------------|
|                             |           | OR (95% CI)      | P value (Z test) | Q                  | P value      | I <sup>2</sup> |                                         |
| Subjects of all ages        | 4         | 0,24 (0,18-0,32) | <0,001           | 0,551              | <b>0,908</b> | 0%             | [13,15,45,60]                           |
| School age subjects         | 5         | 0,32 (0,13-0,81) | <b>0,017</b>     | 36,14              | <0,001       | 88,93%         | [9,27,28,59]                            |
| All subjects infected (YES) | 4         | 0,34 (0,20-0,57) | <0,001           | 5,51               | <b>0,138</b> | 45,58%         | [13,15,28]                              |
| All subjects infected (NO)  | 5         | 0,24 (0,09-0,64) | <b>0,004</b>     | 48,51              | <0,001       | 91,75%         | [9,27,45,59,60]                         |
| Endpoint (0-6 months)       | 3         | 0,46 (0,29-0,72) | <b>0,001</b>     | 1,12               | <b>0,570</b> | 0%             | [13,28]                                 |
| Endpoint (7-12 months)      | 5         | 0,27 (0,11-0,64) | <b>0,003</b>     | 48,93              | <0,001       | 91,82%         | [15,27,45,59,60]                        |
| Endpoint (>12 months)       | 1         | 0,12 (0,04-0,38) | <0,001           | -                  | -            | -              | [9]                                     |
| East Africa                 | 4         | 0,52 (0,26-1,04) | 0,068            | 17,17              | <0,001       | 82,53%         | [27,28,45]                              |
| West Africa                 | 5         | 0,18 (0,11-0,28) | <0,001           | 6,49               | <b>0,165</b> | 38,39%         | [9,13,15,59,60]                         |

**S3 Table K.** Analysis of blood hemoglobin before and after treatment, stratified by subgroups

| Subgroup               | Study (N) | Effect size        |                  | Heterogeneity test |         |                | Study References (see listing pp. 7-10) |
|------------------------|-----------|--------------------|------------------|--------------------|---------|----------------|-----------------------------------------|
|                        |           | SMD (95% CI)       | P value (Z test) | Q                  | P value | I <sup>2</sup> |                                         |
| Placebo                | 4         | -0,88 (-3,09/1,31) | 0,430            | 597,1              | <0,001  | 99,49%         | [3,37,51,52]                            |
| Schist.*               | 7         | 0,59 (-0,02/1,22)  | 0,060            | 213,8              | <0,001  | 97,19%         | [2,6,37,52,51,40]                       |
| Schist./Helmin.*       | 5         | 0,62 (-0,91/2,15)  | 0,427            | 2,431              | <0,001  | 99,83%         | [3,6,32,49,23]                          |
| Endpoint (0-6 months)  | 7         | 0,29 (-0,43/1,02)  | 0,427            | 368,4              | <0,001  | 98,3%          | [2,3,6,37,49,51]                        |
| Endpoint (7-12 months) | 5         | 1,04 (-0,61/2,69)  | 0,216            | 2207               | <0,001  | 99,81%         | [32,52,40,23]                           |
| Endpoint (>12 months)  | 3         | 0,42 (0,175/0,666) | <b>0,001</b>     | 8,65               | 0,013   | 76,89%         | [6,23]                                  |
| Venous blood           | 5         | 1,37 (-0,28/3,03)  | 0,103            | 939,2              | <0,001  | 99,57%         | [32,37,51,52]                           |
| Capillary blood        | 7         | 0,06 (-0,22/0,35)  | 0,672            | 114,1              | <0,001  | 94,74%         | [2,3,6,49,40,23]                        |

## Full reference list of papers cited in S3 Tables A-K

1. Awad El Karim MA, Collins KJ, Sukkar MY, Omer AHS, Amin MA, Doré C. An assessment of anti-schistosomal treatment on physical work capacity. *J Trop Med Hyg.* 1981; 84:67-72.
2. Ayoya MA, Spiekermann-Brouwer GM, Traore AK, Stoltzfus RJ, Habicht JP, Garza C. Multiple micronutrients including iron are not more effective than iron alone for improving hemoglobin and iron status of Malian school children. *J Nutr.* 2009;139(10):1972–9.
3. Beasley NMR, Tomkins AM, Hall A, Kihamia CM, Lorri W, Nduma B, et al. The impact of population level deworming on the haemoglobin levels of schoolchildren in Tanga, Tanzania. *Trop Med Int Heal.* 1999;4(11):744–50.
4. Berhe N, Myrvang B, SG G. Reversibility of schistosomal periportal thickening/fibrosis after praziquantel therapy: a twenty-six month follow-up study in Ethiopia. *Am J Trop Med Hyg.* 2008;78(2):228–34.
5. Betson M, Sousa-Figueiredo JC, Kabatereine NB, Stothard JR. Use of fecal occult blood tests as epidemiologic indicators of morbidity associated with intestinal schistosomiasis during preventive chemotherapy in young children. *Am J Trop Med Hyg.* 2012;87(4):694–700.
6. Bhargava A, Jukes M, Lambo J, Kihamia CM, Lorri W, Nokes C, et al. Anthelmintic treatment improves the hemoglobin and serum ferritin concentrations of Tanzanian schoolchildren. *Food Nutr Bull.* 2003;24(4):332–42.
7. Boisier P, CE R, VE R, Rabarijaona L, Serieye J, Roux J, et al. Reversibility of *Schistosoma mansoni*-associated morbidity after yearly mass praziquantel therapy: ultrasonographic assessment. *Trans R Soc Trop Med Hyg.* 1998;92(4):451–3.
8. Butterworth AE, Sturrock RF, Ouma JH, Mbugua GG, Fulford AJC, Kariuki HC, et al. Comparison of different chemotherapy strategies against *Schistosoma mansoni* in Machakos district, Kenya - effects on human infection and morbidity. *Parasitology.* 1991;103(3):339–55.
9. Campagne G, Garba a, Barkiré H, Vera C, Sidiki a, Chippaux JP. Continued ultrasonic follow-up of children infected with *Schistosoma haematobium* after treatment with praziquantel. *Trop Med Int Health.* 2001;6(1):24–30.
10. Carlton EJ, Hsiang M, Zhang Y, Johnson S, Hubbard A, Spear RC. The impact of *Schistosoma japonicum* infection and treatment on ultrasound-detectable morbidity: a five-year cohort study in Southwest China. *PLoS Negl Trop Dis.* 2010;4(5):e685.
11. Cook JA, Jordan P, Woodstock L, Pilgrim V. A controlled trial of hycanthon and placebo in schistosomiasis mansoni in St. Lucia. *Ann Trop Med Parasitol.* 1977;71(2):197-203.
12. Cota GF, Pinto-Silva RA, Antunes CMF, Lambertucci JR. Ultrasound and clinical investigation of hepatosplenic schistosomiasis: Evaluation of splenomegaly and liver fibrosis four years after mass chemotherapy with oxamniquine. *Am J Trop Med Hyg.* 2006;74(1):103–7.
13. Delegue P, Picquet M, DJ S, Vercruyssen J, Sambou B, Ly A. Morbidity induced by *Schistosoma haematobium* infections, as assessed by ultrasound before and after treatment with praziquantel, in a recently expanded focus (Senegal River basin). *Ann Trop Med Parasitol.* 1998;92(7):775–83.
14. DeStigter KV, King CH, Keating CE, Ouma JH, Siongok TK, Mahmoud AF. Effects of targeted mass treatment on intensity of infection and morbidity in schistosomiasis mansoni: seven-year follow-up of a community in machakos, kenya. *Trans Assoc Am Physicians.* 1989;102:209–12.
15. Devidas A, Lamothe F, Develoux M, Mouchet F, Sellin B. Ultrasonographic assessment of the regression of bladder and renal lesions due to *Schistosoma haematobium* after treatment with praziquantel. *Ann Soc Belg Med Trop.* 1989;69(1):57–65.
16. Doehring E, Ehrlich JH, Bremer HJ. Reversibility of urinary tract abnormalities due to *Schistosoma haematobium* infection. *Kidney Int.* 1986;30(4):582–5.
17. Doehring-Schwerdtfeger E, Abdel-Rahim IM, Kardorff R, Kaiser C, Franke D, Schlake J, et al. Ultrasonographical investigation of periportal fibrosis in children with *Schistosoma mansoni* infection: Reversibility of morbidity twenty-three months after treatment with praziquantel. *Am J Trop Med Hyg.* 1992;46(4):409–15.
18. Frenzel K, Grigull L, Odongo-Aginya E, Ndugwa CM, Loroni-Lakwo T, Schweigmann U, et al. Evidence for a long-term effect of a single dose of praziquantel on *Schistosoma mansoni*-induced hepatosplenic lesions in northern Uganda. *Am J Trop Med Hyg.* 1999;60(6):927–31.

19. Gryseels B, Nkulikyinka L, Engels D. Impact of repeated community-based selective chemotherapy on morbidity due to schistosomiasis mansoni. *Am J Trop Med Hyg.* 1994;51(5):634–41.
20. Hadidjaja P, Syamsuddin N, Ismid IS, Sudomo M, Campbell J, Putrali J. The impact of schistosomiasis mass treatment on hepato-splenomegaly in Napu Valley, Central Sulawesi, Indonesia. *Southeast Asian J Trop Med Public Health.* 1985;16(3):401–4.
21. Hatz C, Mayombana C, Savigny D, MacPherson CNL, Koella JC, Degrémont A, Tanner M. Ultrasound scanning for detecting morbidity due to *Schistosoma haematobium* and its resolution following treatment with different doses of praziquantel. *Trans R Soc Trop Med Hyg.* 1990;84:84–88.
22. Homeida MA, el Tom I, Nash T, Bennett JL. Association of the therapeutic activity of praziquantel with the reversal of Symmers' fibrosis induced by *Schistosoma mansoni*. *Am J Trop Med Hyg.* 1991;45(3):360–5.
23. Kabatereine NB, Brooker S, Koukounari A, Kazibwe F, Tukahebwa EM, Fleming FM, et al. Impact of a national helminth control programme on infection and morbidity in Ugandan schoolchildren. *Bull World Health Organ.* 2007;85(2):91–9.
24. Kahama AI, Odek AE, Kihara RW, Vennervald BJ, Kombe Y, Nkulila T, et al. Urine circulating soluble egg antigen in relation to egg counts, hematuria, and urinary tract pathology before and after treatment in children infected with *Schistosoma haematobium* in Kenya. *Am J Trop Med Hyg.* 1999;61(2):215–9.
25. Kiliku FM, Kimura E, Muhoho N, Migwi DK, Katsumata T. The usefulness of urinalysis reagent strips in selecting *Schistosoma haematobium* egg positives before and after treatment with praziquantel. *J Trop Med Hyg.* 1991;94(6):401–6.
26. King CH, Lombardi G, Lombardi C, Greenblatt R, Hodder S, Kinyanjui H, et al. Chemotherapy-based control of schistosomiasis haematobia. II. Metrifonate vs. praziquantel in control of infection-associated morbidity. *Am J Trop Med Hyg.* 1990;42(6):587–95.
27. King CH, Lombardi G, Lombardi C, Greenblatt R, Hodder S, Kinyanjui H, et al. Chemotherapy-based control of schistosomiasis haematobia. I. Metrifonate versus praziquantel in control of intensity and prevalence of infection. *Am J Trop Med Hyg.* 1988;39(3):295–305.
28. King CH, Muchiri EM, Mungai P, Ouma JH, Kadzo H, Magak P, et al. Randomized comparison of low-dose versus standard-dose praziquantel therapy in treatment of urinary tract morbidity due to *Schistosoma haematobium* infection. *Am J Trop Med Hyg.* 2002;66(6):725–30.
29. Kitange HM, Swai ABM, McLarty DG, Alberti KGMM. Schistosomiasis prevalence after administration of praziquantel to school children in Melela village, Morogoro region, Tanzania. *East Afr Med J.* 1993;70(12):782–6.
30. Kongs A, Verle P, Dieng A, Talla I, Rouquet P. Clinical investigation of a population recently infected with *Schistosoma mansoni* (Richard-Toll, Senegal). *Trop Med Int Heal.* 1996;1(2):191–8.
31. Koukounari A, Donnelly CA, Sacko M, Keita AD, Landouré A, Dembelé R, et al. The impact of single versus mixed schistosome species infections on liver, spleen and bladder morbidity within Malian children pre- and post-praziquantel treatment. *BMC Infect Dis.* 2010;10:227.
32. Koukounari A, Gabrielli AF, Toure S, Bosque-Oliva E, Zhang Y, Sellin B, et al. *Schistosoma haematobium* infection and morbidity before and after large-scale administration of praziquantel in Burkina Faso. *J Infect Dis.* 2007;196(5):659–69.
33. Latham MC, Stephenson LS, Hall A, Wolgemuth JC, Elliot TC, Crompton DET. Parasitic infections, anaemia and nutritional status: a study of their interrelationships and the effect of prophylaxis and treatment on workers in Kwale District, Kenya. *Trans R Soc Trop Med Hyg.* 1983;77(1):411–48.
34. Li YS, Sleight AC, Li Y, Tanner M, Dessein A, Williams GM, et al. Five-year impact of repeated praziquantel treatment on subclinical morbidity due to *Schistosoma japonicum* in China. *Trans R Soc Trop Med Hyg.* 2002;96(4):438–43.
35. Li YS, Sleight AC, Ross AG, Li Y, Williams GM, Tanner M, et al. Two-year impact of praziquantel treatment for *Schistosoma japonicum* infection in China: re-infection, subclinical disease and fibrosis marker measurements. *Trans R Soc Trop Med Hyg.* ENGLAND; 2000;94(2):191–7.



36. Martins-Leite P, Gazzinelli G, Alves-Oliveira LF, Gazzinelli A, Malaquias LCC, Correa-Oliveira R, et al. Effect of chemotherapy with praziquantel on the production of cytokines and morbidity associated with schistosomiasis mansoni. *Antimicrob Agents Chemother.* 2008;52(8):2780–6.
37. McGarvey ST, Aligui G, Graham KK, Peters P, Olds GR, Olveda R. Schistosomiasis japonica and childhood nutritional status in northeastern Leyte, the Philippines: a randomized trial of praziquantel versus placebo. *Am J Trop Med Hyg.* 1996;54(5):498–502.
38. Mekonnen A, Legesse M, Belay M, Tadesse K, Torben W, Teklemariam Z, et al. Efficacy of Praziquantel against *Schistosoma haematobium* in Dulshatalo village, western Ethiopia. *BMC Res Notes.* 2013;6(1):392.
39. Mott KE, Dixon H, Osei-Tutu E, England EC, Davis A. Effect of praziquantel on hematuria and proteinuria in urinary schistosomiasis. *Am Soc Trop Med Hyg.* 1985;34(6):1119–26.
40. Mwanakasale V, Siziya S, Mwansa J, Koukounari A, Fenwick A. Impact of iron supplementation on schistosomiasis control in Zambian school children in a highly endemic area. *Malawi Med J.* 2009;21(1):12–8.
41. Ndamba J, Makaza N, Munjoma M, Gomo E, Kaondera KC. The physical fitness and work performance of agricultural workers infected with *Scgistosoma mansoni* in Zimbabwe. *Ann Trop Med Parasitol.* 1993;87(6):553–561.
42. Peixinho EL, André B, Bina JC. Sintomatologia intestinal na fase crônica da esquistossomose mansoni. *Rev Soc Bras Med Trop.* 1986;19(1):27–30.
43. Rahoud SA, Mergani A, Khamis AH, Saeed OK, Mohamed-Ali Q, Dessenin AJ, et al. Factors controlling the effect of praziquantel on liver fibrosis in *Schistosoma mansoni*-infected patients. *FEMS Immunol Med Microbiol.* 2010;58(1):106–12.
44. Ramarakoto CE, Leutscher PDC, van Dam G, Christensen NO. Ultrasonographical findings in the urogenital organs in women and men infected with *Schistosoma haematobium* in northern Madagascar. *Trans R Soc Trop Med Hyg.* 2008;102(8):767–73.
45. Rasendramino MH, Rajaona HR, Ramarakoto VE, Leutscher P, Cordonnier D, Esterre P. Effect du praziquantel sur les retentissements uro-néphrologiques de la bilharziose urinaire. *Néphrologie.* 1998;19(6):347–51.
46. Reimert CM, Mshinda HM, Hatz CF, Kombe Y, Nkulila T, Poulsen LK, et al. Quantitative assessment of eosinophiluria in *Schistosoma haematobium* infections: A new marker of infection and bladder morbidity. *Am J Trop Med Hyg.* 2000;62(1):19–28.
47. Ruiz-Guevara R, de Noya BA, Valero SK, Lecuna P, Garassini M, Noya O. Clinical and ultrasound findings before and after praziquantel treatment among Venezuelan schistosomiasis patients. *Rev Soc Bras Med Trop.* 2007;40(5):505–11.
48. Sarda RK, Kihamia CM, Minjas JN, Mahikwano LF. Haematuria and proteinuria in urinary schistosomiasis: response to therapy with praziquantel in Tanzanian children. *Trop Med Parasitol.* 1987;38(1):31–3.
49. Sissoko MS, Dabo A, Traore H, Diallo M, Traore B, Konate D, et al. Efficacy of artesunate + sulfamethoxypyrazine/pyrimethamine versus praziquantel in the treatment of *Schistosoma haematobium* in children. *PLoS One.* United States; 2009;4(10):e6732.
50. Sleight AC, Mott KE, Hoff R, Maguire JH, da Fran??a Silva JT. Manson's schistosomiasis in Brazil: 11-year evaluation of successful disease control with oxamniquine. *Lancet.* 1986;1:635–7.
51. Stephenson LS, Kurz KM, Kinoti SN, Oduori ML, Crompton DW. Relationships of *Schistosoma hematobium*, hookworm and malarial infections and metrifonate treatment to hemoglobin level in Kenyan school children. *Am J Trop Med Hyg.* 1985;34(3):519–28.
52. Stephenson LS, Kinoti SN, Latham MC, Kurz KM, Kyobe J. Single dose metrifonate or praziquantel treatment in Kenyan children. I. Effects on *Schistosoma haematobium*, hookworm, hemoglobin levels, splenomegaly, and hepatomegaly. *Am-J-Trop-Med-Hyg.* 1989;41(4):436–44.
53. Stephenson LS, Latham MC, Kinoti SN, Oduori ML. Regression of splenomegaly and hepatomegaly in children treated for *Schistosoma haematobium* infection. *Am J Trop Med Hyg.* 1985;34(1):119–23.
54. Stephenson LS, Latham MC, Kinoti SN, Oduori ML. Sensitivity and specificity of reagent strips in screening of Kenyan children for *Schistosoma haematobium* infection. *Am J Trop Med Hyg.* 1984;33(5):862–71.

55. Stete K, Krauth SJ, Coulibaly JT, Knopp S, Hattendorf J, Müller I, et al. Dynamics of *Schistosoma haematobium* egg output and associated infection parameters following treatment with praziquantel in school-aged children. *Parasit Vectors*. 2012;5(1):298.
56. Sukwa TY, Bulsara MK, Wurapa FK. Reduction in prevalence, intensity of infection and morbidity due to schistosoma mansoni infection in a community following treatment with praziquantel. *J Trop Med Hyg*. 1987;90(4):205-11.
57. Sukwa TY. A community-based randomized trial of praziquantel to control schistosomiasis morbidity in schoolchildren in Zambia. *Ann Trop Med Parasitol*. 1993;87(2):185-94.
58. Sukwa, Ba B, Fk W, Sukwa TY, Boatman B a, Wurapa FK. A three year follow-up of chemotherapy with praziquantel in a rural Zambian community endemic for schistosomiasis mansoni. *Trans R Soc Trop Med Hyg*. 1988;82(2):258-60.
59. Tohon ZB, Mainassara HB, Garba A, Mahamane AE, Bosqué-Oliva E, Ibrahim ML, et al. Controlling schistosomiasis: Significant decrease of anaemia prevalence one year after a single dose of praziquantel in Nigerien schoolchildren. *PLoS Negl Trop Dis*. 2008;2(5):e241.
60. Traore M, Traore HA, Kardorff R, Diarra A, Landoure A, Vester U, et al. The public health significance of urinary schistosomiasis as a cause of morbidity in two districts in Mali. *Am J Trop Med Hyg*. 1998;59(3):407-13.
61. Vennervald BJ, Booth M, Butterworth AE, Kariuki HC, Kadzo H, Ireri E, et al. Regression of hepatosplenomegaly in Kenyan school-aged children after praziquantel treatment and three years of greatly reduced exposure to *Schistosoma mansoni*. *Trans R Soc Trop Med Hyg*. 2005;99(2):150-60.
62. Wagatsuma Y, Aryeetey ME, Sack DA, Morrow RH, Hatz C, Kojima S. Resolution and resurgence of schistosoma haematobium-induced pathology after community-based chemotherapy in Ghana, as detected by ultrasound. *J Infect Dis*. 1999;179(6):1515-22.
63. Wiest PM, Wu G, Zhong S, McGarvey ST, Yuan J, Olveda RM, et al. Impact of annual screening and chemotherapy with praziquantel on schistosomiasis japonica on Jishan Island, People's Republic of China. *Am J Trop Med Hyg*. 1994;51(2):162-9.
64. Zhao G, Jiang Q, Wasley A, Zhang S, Wu Z, Liu Z, Yuan H. Changes in prevalence, intensity of infection and morbidity due to *Schistosoma japonicum* infection in a community following a single treatment with praziquantel. *Trop Geogr Med*. 1995;47(6):289-292.
