# Supplementary material for: Decline in infection-related morbidities following drug-mediated reductions in the intensity of Schistosoma infection: A systematic review and meta-analysis
Source: PubMed Central journal article supplement (PMC5333910; doi:10.1371/journal.pntd.0005372), 2017-02-17

## Hepatomegaly-Left

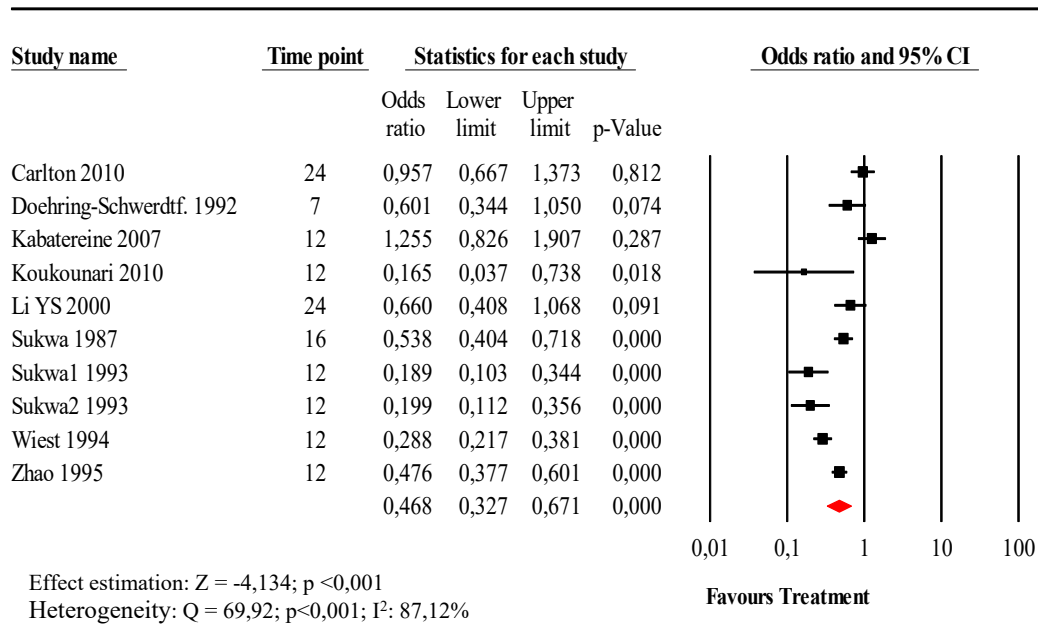

## Hepatomegaly-Right

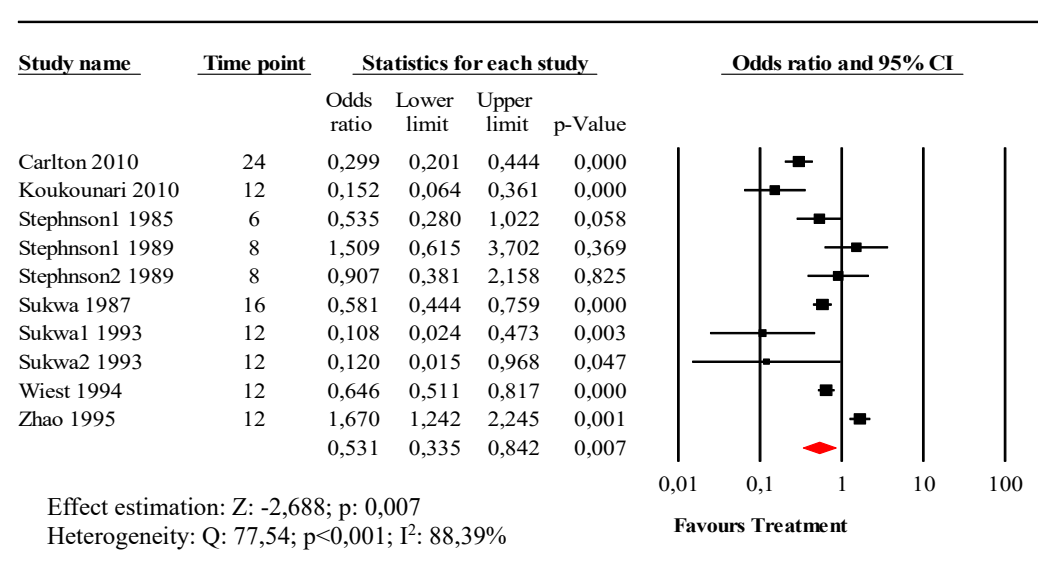

Hepatomegaly-no specific lobe

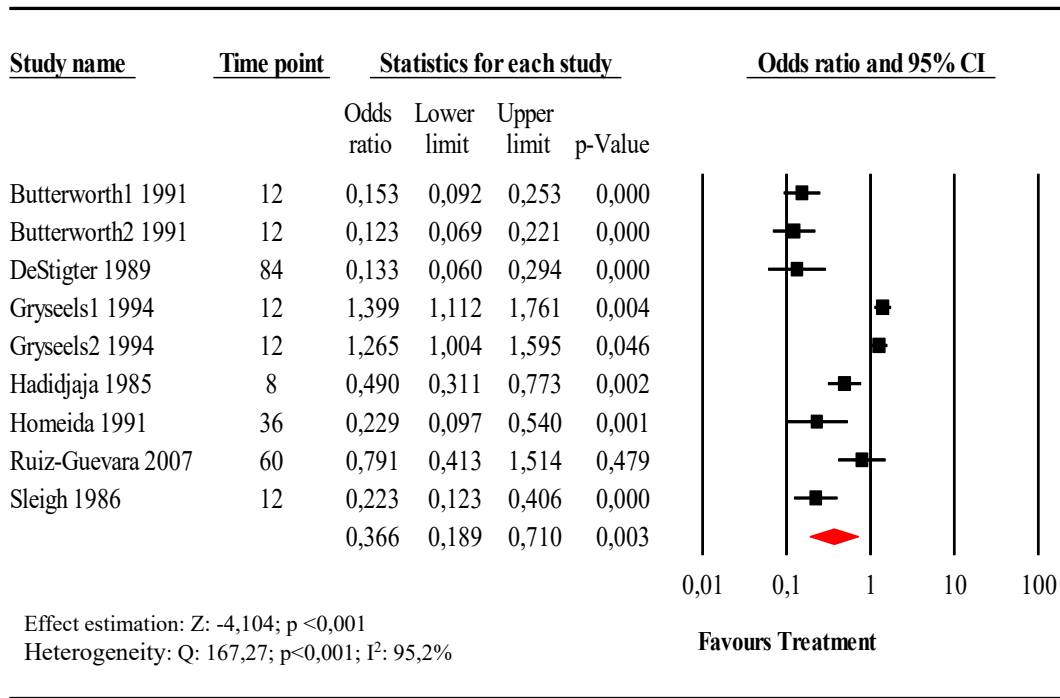

Splenomegaly

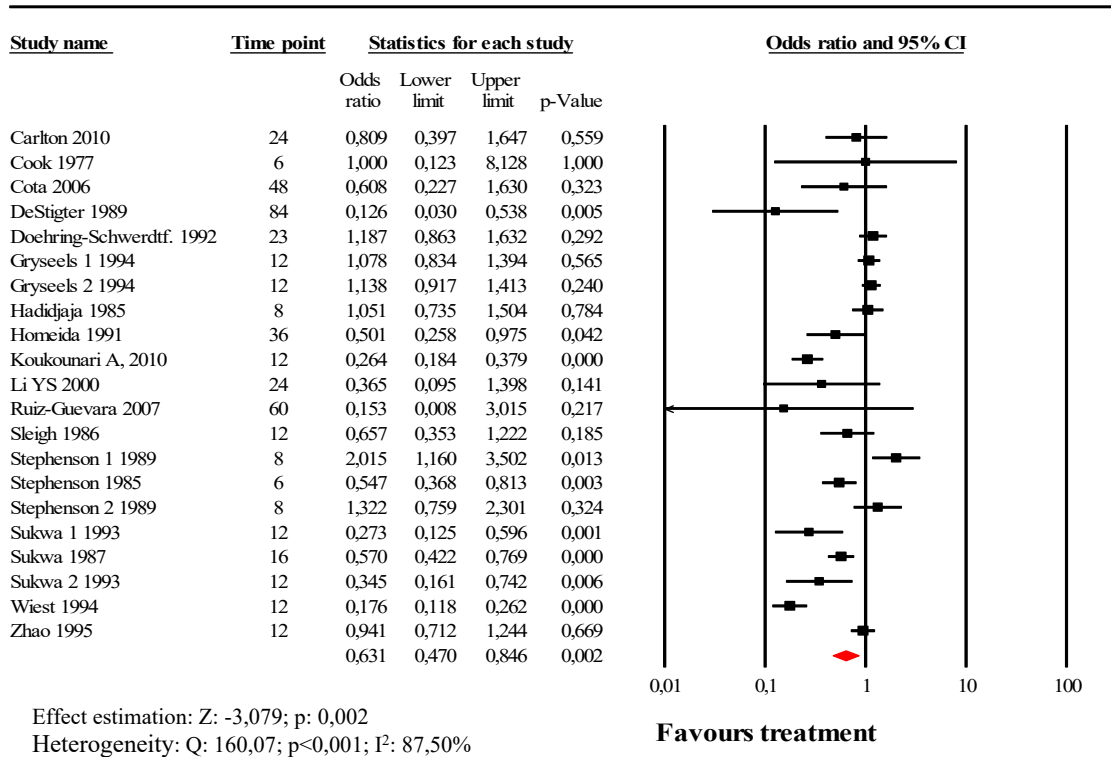

## Periportal Fibrosis

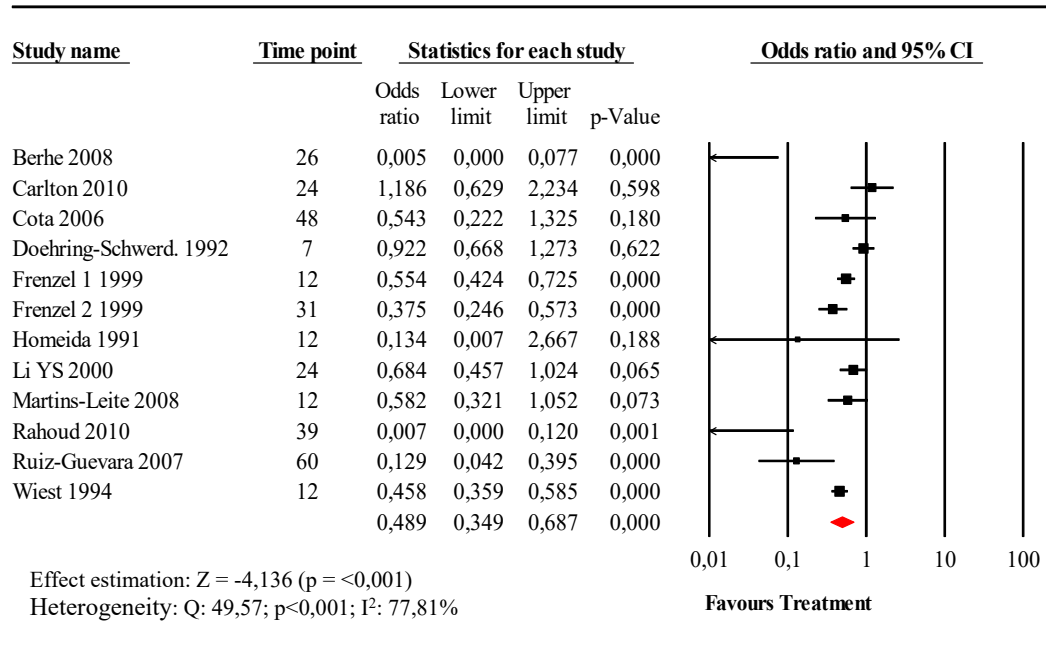

## Main Portal Vein

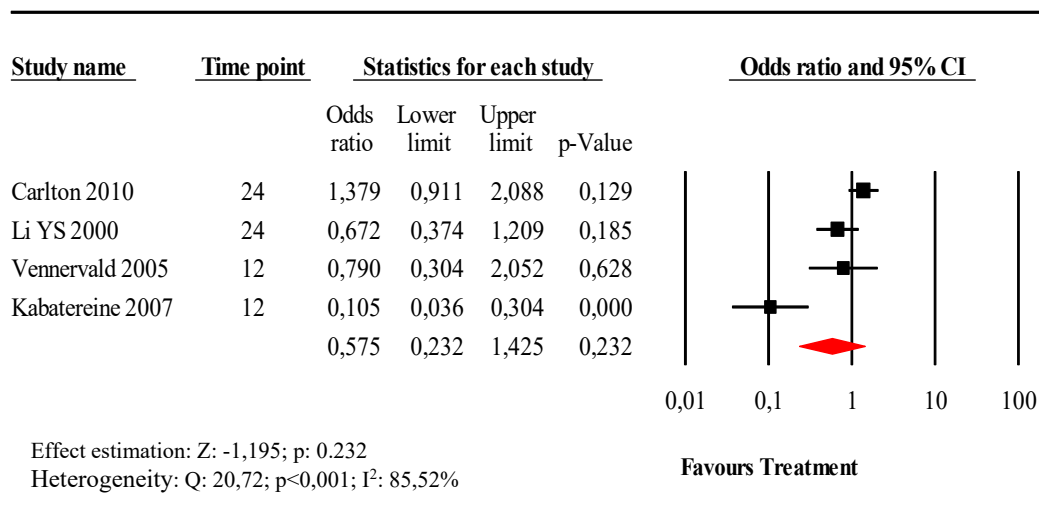

Diarrhea

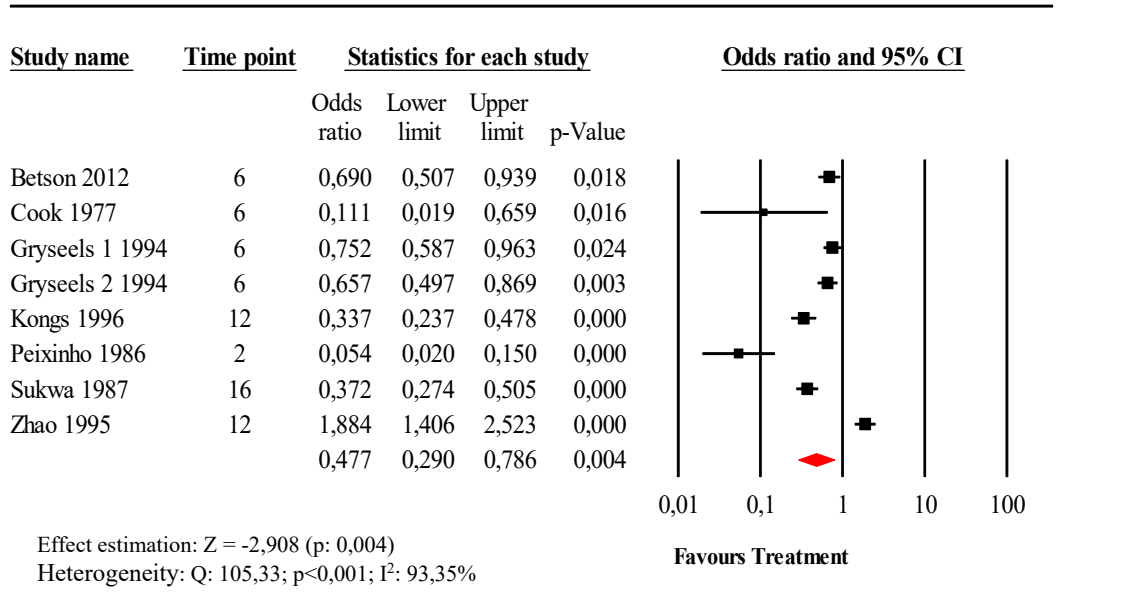

Blood in the Stool

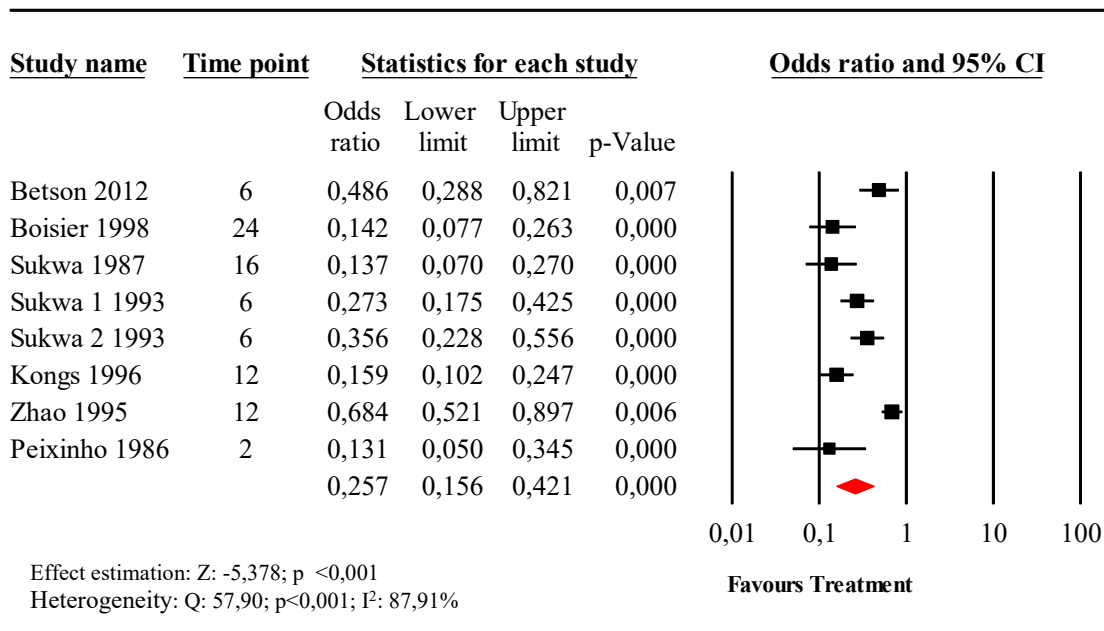

## Hematúria

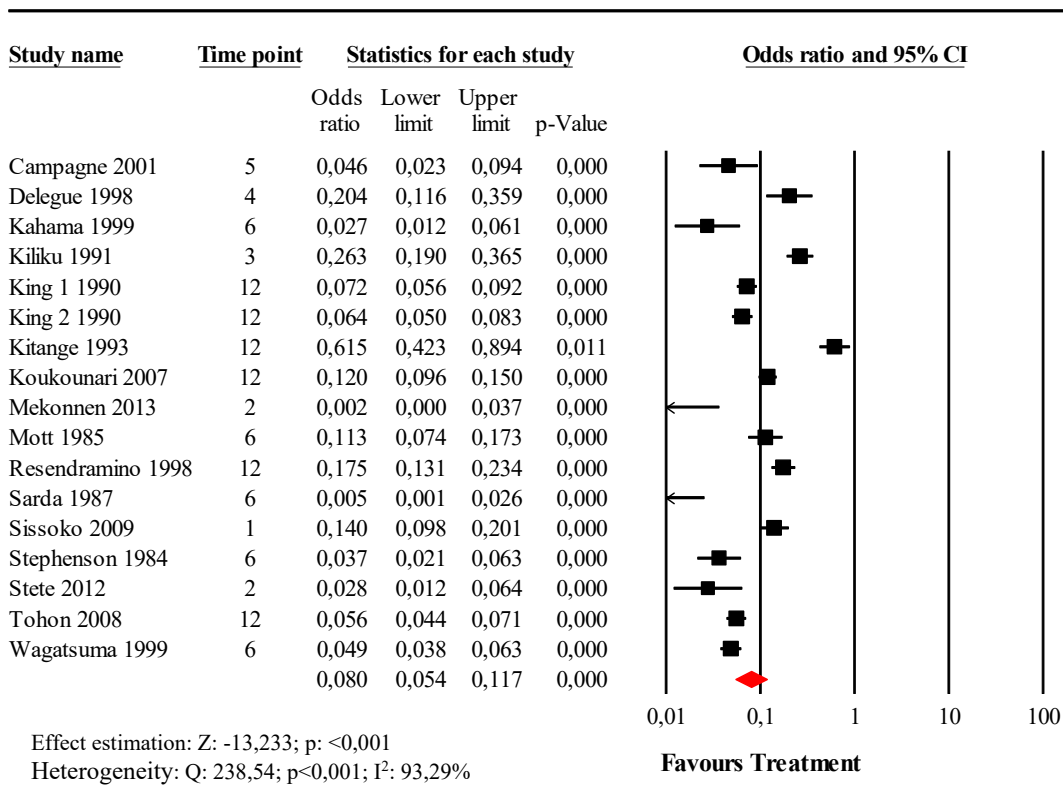

## Proteinuria

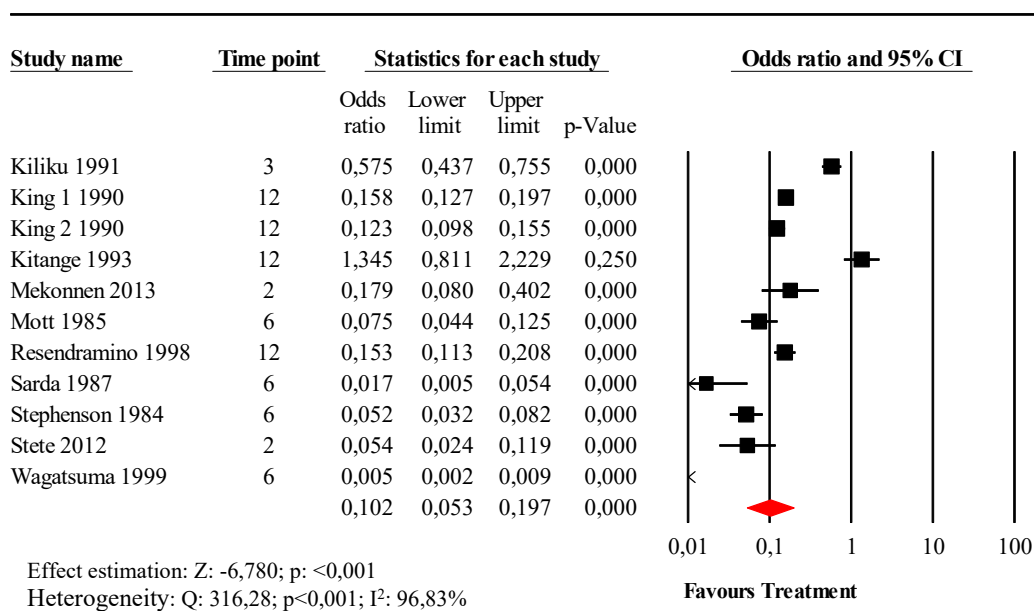

## Urinary Bladder

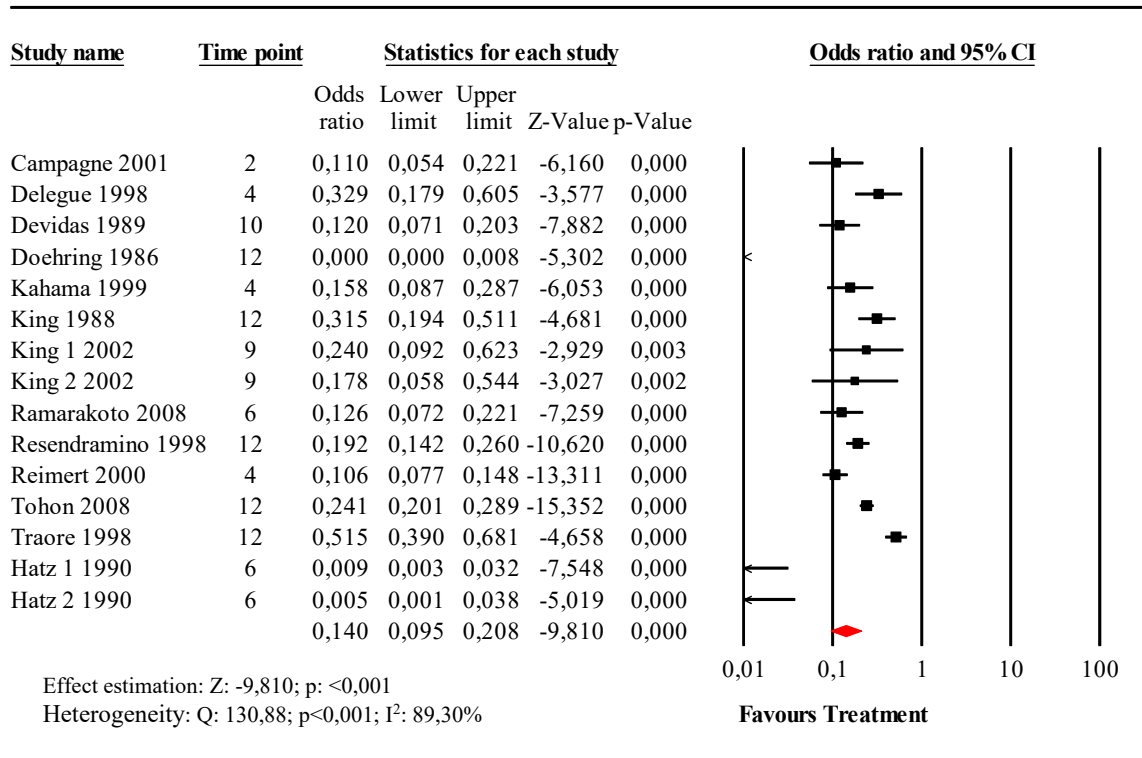

## Upper urinary tract

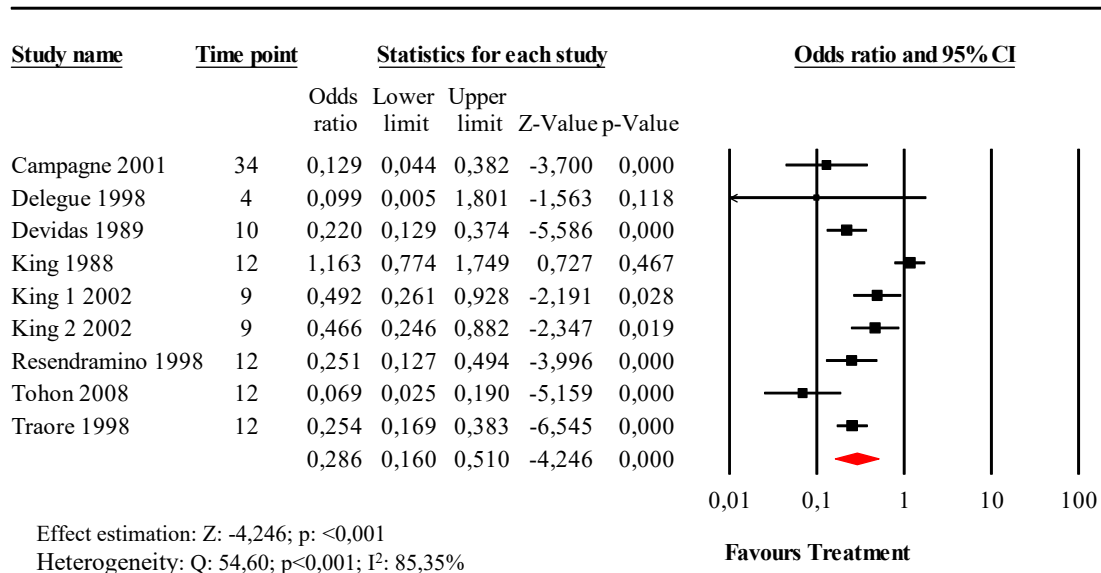

Supplement: pntd.0005372.s006.pdf [file pntd.0005372.s006.pdf]
