# Supplementary material for: Decline in infection-related morbidities following drug-mediated reductions in the intensity of Schistosoma infection: A systematic review and meta-analysis
Source: PubMed Central journal article supplement (PMC5333910; doi:10.1371/journal.pntd.0005372), 2017-02-17
Supplement: pntd.0005372.s010.pdf [file pntd.0005372.s010.pdf]

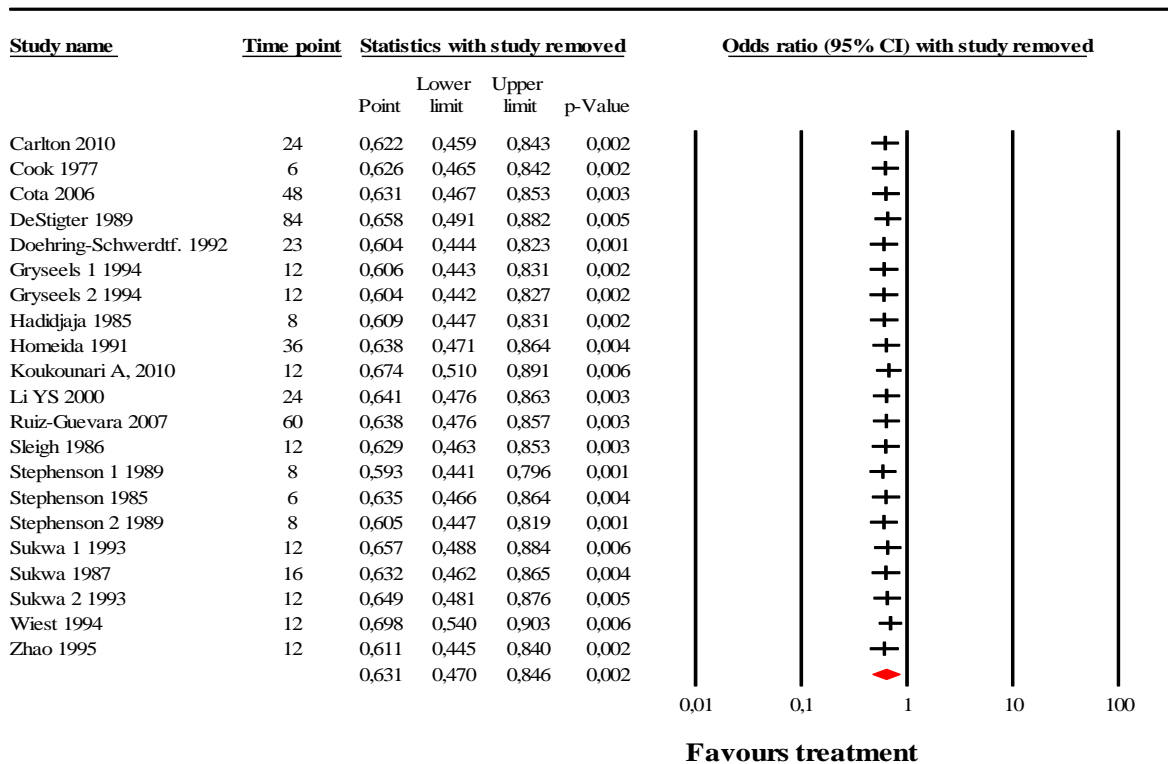

**S5 Fig.** Forest plot showing sensitivity analysis, performed by removing one study at a time, for the effect of treatment on prevalence of splenomegaly.
